# **LncRNA *Dnmt3aos* regulates *Dnmt3a* expression leading to aberrant DNA**

## **methylation in macrophage polarization**

Xueqin Li<sup>1,2,+</sup>, Yingying Zhang<sup>2,3,+</sup>, Mengying Zhang<sup>1,2</sup>, Xiang Kong<sup>1,2</sup>, Hui Yang<sup>1,2</sup>,  
Min Zhong<sup>1,2</sup>, Weiya Pei<sup>1</sup>, Yang Xu<sup>1,2</sup>, Xiaolong Zhu<sup>1,2</sup>, Tianbing Chen<sup>1,2</sup>, Jingjing  
Ye<sup>1</sup>, and Kun Lv<sup>1,2,\*</sup>

<sup>1</sup> Central Laboratory of Yijishan Hospital, Wannan Medical College, Wuhu, 241001,  
PR China

<sup>2</sup> Non-coding RNA Research Center of Wannan Medical College, Wuhu, 241001, PR  
China

<sup>3</sup> Laboratory Medicine of Yijishan Hospital, Wannan Medical College, Wuhu, 241001,  
PR China

\*Corresponding To: Dr. Kun Lv, Central Laboratory of Yijishan Hospital, Wannan  
Medical College, 2 Western Zheshan Road, Wuhu 241001, People's Republic of  
China

E-mail: lvkun315@126.com

Tel: 86-553-5739912

<sup>+</sup>These authors contributed equally to this work.

## Abstract

Long non-coding RNAs (lncRNAs) play key roles in various biological processes. However, the roles of lncRNAs in macrophage polarization remain largely unexplored. In this study, thousands of lncRNAs were identified that are differentially expressed in distinct polarized bone marrow-derived macrophages (BMDMs). Among them, *Dnmt3aos* (DNA methyltransferase 3A, opposite strand), as a known lncRNA, locates on the antisense strand of *Dnmt3a*. Functional experiments further confirmed that *Dnmt3aos* were highly expressed in M(IL-4) macrophages and participated in the regulation of *Dnmt3a* expression, and played a key role in macrophage polarization. The DNA methylation profiles between the *Dnmt3aos* knockdown group and the control group in M(IL-4) macrophages were determined by MeDIP-seq technique for the first time, and the *Dnmt3aos-Dnmt3a* axis-mediated DNA methylation modification-regulated macrophage polarization related gene *IFN-γ* was identified. Our study will help to enrich our knowledge of the mechanism of macrophage polarization and will provide new insights for immunotherapy in macrophage-associated diseases.

**Keywords:** LncRNA, DNA methylation, Dnmt3a, macrophage polarization

## Abbreviations:

LncRNA, Long non-coding RNA; Dnmt3aos, DNA methyltransferase 3A opposite strand; Dnmt3a, DNA methyltransferase 3a; BMDM, bone marrow-derived macrophages; MeDIP-seq, methylated DNA immunoprecipitation sequencing; LPS, lipopolysaccharides; IFN- $\gamma$ , interferon-gamma; GM-CSF, granulocyte-macrophage colony stimulating factor; IL-4, interleukin-4; IL-12, interleukin-12; IL-13, interleukin-13; TNF- $\alpha$ , tumor necrosis factor alpha; NO, nitric oxide; CD80, cluster of differentiation 80; CD68, cluster of differentiation 68; M-CSF, macrophage colony stimulating factors; TGF- $\beta$ , transforming growth factor beta-1; Arg-1, Arginase 1; YM1, chitinase 3-like 3; Fizz1, Resistin-like- $\alpha$ ; DMR, differentially methylated region; UTR, untranslated region; CDS, coding sequence; TTR, transcriptional termination region; GO, gene ontology; DEG, differentially expressed gene; 5-Aza-CdR, 5-Aza-2'-deoxycytidine; BSP, bisulfite sequencing PCR; ncRNA, non-coding RNA.

## Introduction

Macrophages, as an essential component of the innate immune system, are widely distributed throughout the organs and tissues and possess high heterogeneity and plasticity. Macrophages can be broadly classified into two extremely polarized phenotypes, “Classical” and “Alternative,” which exhibit different functions under the influence of distinct microenvironmental stimuli. Classically activated macrophages have long been known to be induced by lipopolysaccharides (LPS) and interferon-gamma (IFN- $\gamma$ ) or granulocyte-macrophage colony stimulating factor (GM-CSF), and are characterized by high levels of pro-inflammatory cytokines such as interleukin-12 (IL-12) and tumor necrosis factor alpha (TNF- $\alpha$ ) and oxidative metabolites such as nitric oxide (NO). M(LPS+IFN- $\gamma$ ) macrophages generally promote Th1-type immune responses, with upregulation of MHC II and the costimulatory molecules CD80 and CD86, which are essential for antigen presentation and which strengthen phagocytosis and killing of pathogenic microorganisms or tumor cells [1,2]. In contrast, the alternative M(IL-4) macrophages are induced by Th2 cytokines (such as IL-4 and IL-13) or macrophage colony stimulating factors (M-CSF), with high secretion levels of anti-inflammatory cytokines such as IL-10 and transforming growth factor beta-1 (TGF- $\beta$ ), and high expression of Arginase 1 (Arg-1), chitinase 3-like 3 (Chi3l3 or YM1), and Resistin-like- $\alpha$  (Retnl  $\alpha$  or Fizz1). These macrophages participate in tissue repair, angiogenesis, tumor progression, and defense against parasite infection [1,3,4]. Therefore, macrophage polarization is a vital component in the progression of many

diseases, including infection [5], tumors [2,6], obesity, and insulin resistance [7,8].

Further study of the molecular mechanisms regulating macrophage polarization will enhance our understanding of the pathogenesis and development of macrophage-centered diseases and provide a basis for the diagnosis and treatment of such diseases. However, the regulatory mechanism of the macrophage activation conditioning response remains to be further elucidated.

LncRNAs are RNA molecules > 200 nucleotides long. They are therefore structurally similar to mRNA, but they do not encode proteins. The lncRNAs are emerging as important regulators of gene transcriptional regulation, chromatin remodeling, nuclear transportation, and other biological processes [9]. They play pivotal roles in various human diseases. Recent studies have confirmed that lncRNAs correlate with macrophage differentiation and activation [10-14]. Epigenetic regulation, including DNA methylation, is critical in cell differentiation and development. *De novo* DNA methylation is catalyzed by DNA methyltransferase (DNMT) 3a and 3b. DNA methylation of cytosines at CpG dinucleotides is the most common epigenetic modification, and CpGs are often enriched in the promoter region of genes [15]. Promoters of hypo-methylated genes are typically associated with transcriptionally active genes [16], whereas DNA hyper-methylation can result in gene silencing [17,18]. However, there are few reports on the role of epigenetic modification in macrophage polarization so far. Recently, histone methylation and Dnmt3b mediated DNA methylation have been implicated in the regulation of macrophage polarization [15,19-21]. However, at present, no studies have been

reported on the lncRNAs regulating Dnmt3a expression-mediated aberrant methylation of DNA in macrophage polarization.

In the current study, we utilized microarray and bioinformatics methods to acquire differentially expressed lncRNAs profiles existing in M(LPS+IFN- $\gamma$ ) and M(IL-4) macrophages, and we identify novel lncRNAs, which are functional in macrophage polarization. Among the thousands of lncRNAs that are actively regulated in macrophage polarization, we further determined that lncRNA *Dnmt3aos*, a known lncRNA locates on the *Dnmt3a* antisense strand, is a key regulator of *Dnmt3a* expression and also regulates macrophage polarization. We also used a methylated DNA immunoprecipitation sequencing (MeDIP-seq) method combined with mRNA expression profile analysis to screen the *Dnmt3aos-Dnmt3a* axis-mediated DNA methylation-modified macrophage polarization related genes, and we explored the roles of related genes in macrophage polarization. Our study will help to enrich our understanding of the mechanism of macrophage polarization and will provide new approaches to immunotherapy in macrophage-centered diseases.

## Results

### Identification of *ex vivo* polarized M(LPS+IFN- $\gamma$ ) and M(IL-4) macrophage lncRNAs, including *Dnmt3aos*

To use a systematic approach to identifying alterations in the lncRNA expression profile during macrophage polarization, we examined the lncRNA and mRNA expression profiles in polarized BMDMs through microarray analysis. First, we

prepared the M(LPS+IFN- $\gamma$ ) and M(IL-4) macrophages *in vitro*. BMDMs were isolated from BALB/c mice and stimulated with LPS and IFN- $\gamma$  to obtain M(LPS+IFN- $\gamma$ ) or with IL-4 to obtain M(IL-4). The polarization conditions used in this study resulted in distinct macrophage phenotypes as confirmed in our previous study [22-24].

For the microarray analysis, authoritative data sources containing more than 33,231 lncRNAs were used. To identify the most significant candidates, lncRNAs with at least two-fold differentially expressed changes and with FDR adjusted  $P$  values  $< 0.05$  were selected (Fig 1a and 1b and S1 Data). Under these criteria, 627 lncRNAs were up-regulated, and 624 lncRNAs were down-regulated in the M(LPS+IFN- $\gamma$ ) group compared with the M(IL-4) group. In addition, 696 mRNAs were up-regulated and 557 mRNAs were down-regulated in the M(LPS+IFN- $\gamma$ ) group compared with the M(IL-4) group (Tab 1 and S1 Data). The mRNA expression profiles were reported in our previous publication [22].

To confirm the microarray results, four differentially expressed lncRNAs were selected for further confirmation using RT-qPCR (Fig 1c). Among the four selected lncRNAs, *AK048798* and *AW112010* were upregulated in M(LPS+IFN- $\gamma$ ) macrophages compared to M(IL-4) macrophages, while *4933417E11Rik* and *Dnmt3aos* were downregulated in M(LPS+IFN- $\gamma$ ) macrophages compared to M(IL-4) macrophages (Fig 1c). The results were generally consistent with the microarray data.

Since many lncRNAs have been shown to regulate neighboring genes either positively or negatively [25-27] as their target genes, the genomic locations of these

lncRNAs were further characterized. We decided to focus on lncRNA *Dnmt3aos* since it is a known lncRNA, locates on the *Dnmt3a* gene antisense strand on mouse chromosome 12 (Fig 1d).

### **Characterization of the *Dnmt3aos* expression pattern**

To further determine the cellular localization of the *Dnmt3aos* transcript, the nuclear and cytosolic RNAs were isolated from BMDMs, and the expressions of *Dnmt3aos* transcripts in both subcellular locations were measured. RT-qPCR data show that *Dnmt3aos* transcripts are highly expressed in the nucleus compared with the cytosol (Fig 1e). As controls, *GAPDH* mRNA is specifically located in the cytosol, whereas *U6* RNA is primarily located in the nucleus (Fig 1e). RNA fluorescence in situ hybridization (RNA FISH) indicates that *Dnmt3aos* is highly expressed in the nucleus (Fig 1f).

We next examined the expression profile of *Dnmt3aos* in multiple mouse tissues. *Dnmt3aos* was expressed in many mouse tissues (S1 Fig), including lung, brain, spleen, pancreas, liver, heart, kidney, and fat.

### **Elevated expression of *Dnmt3aos* in M(IL-4) polarized macrophages contributes to macrophage polarization**

*Dnmt3aos* had increased expression in M(IL-4) macrophages (Fig 2a). Therefore, we further characterized its role in macrophage activation. We assessed the level of *Dnmt3aos* in macrophages after the dynamic process of macrophage re-polarization.



Macrophages with the M(LPS+IFN- $\gamma$ ) or M(IL-4) phenotypes were re-polarized to the M(IL-4) or M(LPS+IFN- $\gamma$ ) phenotype by treatment with LPS/IFN- $\gamma$  or IL-4, respectively. The marker gene (we used iNOS as the marker for M(LPS+IFN- $\gamma$ ) macrophages and Arg1 as the marker for M(IL-4) macrophages [22] ) assays clearly showed that M(LPS+IFN- $\gamma$ ) macrophages could be re-polarized to M(IL-4) macrophages by IL-4 (S2a Fig), and M(IL-4) macrophages could be re-polarized to M(LPS+IFN- $\gamma$ ) macrophages by LPS/IFN- $\gamma$  (S2b Fig). Interestingly, the *Dnmt3aos* levels in macrophages were strikingly elevated during M(LPS+IFN- $\gamma$ )-to-M(IL-4) re-polarization of macrophages (Fig 2b), but *Dnmt3aos* levels decreased following M(IL-4)-to-M(LPS+IFN- $\gamma$ ) re-polarization of macrophages (Fig 2c). These results suggest that *Dnmt3aos* may play a critical role in promoting macrophage polarization to the M(IL-4) phenotype.

### ***Dnmt3aos* regulates *Dnmt3a* RNA and protein in BMDMs**

To test the correlation between *Dnmt3aos* levels and macrophage polarization, the gene was examined after primary BMDMs were treated with LPS/IFN- $\gamma$  or IL-4 stimulation. The *Dnmt3aos* gene was down-regulated with the polarization of M(LPS+IFN- $\gamma$ ) macrophages, but up-regulated with the M(IL-4) polarization (Fig 3a) when compared to the primary BMDMs. Meanwhile, the expression level followed a time course dependent on the LPS/IFN- $\gamma$  or IL-4 stimulation (Fig 3a), and correlated to the M(LPS+IFN- $\gamma$ ) and M(IL-4) phenotype, marked by iNOS and Arg1 gene expression, respectively (S3 Fig). Notably, this expression pattern was almost

identical to that of *Dnmt3a* mRNA (Fig 3b). This observation suggests that *Dnmt3aos* and *Dnmt3a* expression may be regulated concordantly, as was recently shown for other sense-antisense pairs [28-31].

We next investigated whether the *Dnmt3aos* transcript regulates expression of *Dnmt3a* mRNA. RT-qPCR results showed that transfection of primary BMDM cells with *Dnmt3aos* smart silencer (si-*Dnmt3aos*) resulted in a statistically significant knockdown of not only the targeted *Dnmt3aos* transcript, but also of *Dnmt3a* mRNA and protein levels (Fig 3c and 3e). In contrast, the expression of the si-*Dnmt3a* in primary BMDMs resulted in a significant reduction of the targeted *Dnmt3a* mRNA and protein levels (Fig 3d and S4 Fig), but did not affect the expression of *Dnmt3aos* transcripts (Fig 3d). This suggests that *Dnmt3aos* may regulate the expression of *Dnmt3a* at both the mRNA and the protein levels in primary BMDMs. These observations further confirm the regulation of *Dnmt3a* expression by *Dnmt3aos*, not only at the mRNA but also at the protein level.

#### **Knockdown of *Dnmt3aos* expression promotes M(LPS+IFN- $\gamma$ ) macrophage polarization and decreases M(IL-4) macrophage polarization**

The expression profile of *Dnmt3aos* prompted us to investigate its function during macrophage polarization. To determine if *Dnmt3aos* participates in macrophage polarization, we transfected primary BMDM macrophages with *Dnmt3aos* smart silencer. Interestingly, when primary BMDM macrophages were transfected with *Dnmt3aos* smart silencer and then treated with LPS/IFN- $\gamma$  or IL-4, the M(LPS+IFN- $\gamma$ )

phenotype was increased. Specifically, the M(LPS+IFN- $\gamma$ ) macrophage phenotype markers iNOS, TNF- $\alpha$ , and IL-12 were all up-regulated, but the M(IL-4) macrophage markers Arg1, YM1, and FIZZ1 were strikingly down-regulated (Fig 4). These results suggested that *Dnmt3aos* may play a critical role in promoting macrophage polarization.

### **The *Dnmt3aos-Dnmt3a* axis regulates macrophage polarization-related gene expression through modification of DNA methylation**

The establishment and maintenance of *de novo* DNA methyltransferase 3A (Dnmt3a) mediated methylation patterns resulting in modulation of gene expression is one of the key steps in epigenetic regulation during cell differentiation and biological processes [32-35]. Since the *Dnmt3aos* and *Dnmt3a* genes were differentially expressed in macrophage polarization and were highly expressed in M(IL-4) macrophages (Fig 3a and 3b), and based on the results that *Dnmt3aos* regulates *Dnmt3a* gene expression, we carried out methylated DNA immunoprecipitation sequencing (MeDIP-seq) to evaluate the possibility of association between DNA methylation variability and macrophage polarization to identify differentially methylated regions (DMRs) related to macrophage polarization. Indeed, unique DNA methylation features were identified in negative control non-targeting siRNA- (si-NC-) and si-*Dnmt3aos*-transfected M(IL-4) macrophages. We looked at methylation changes in four regions defined by the distance from the CpG islands [36], namely, the CpG island, Shore, Shelf, and Open Sea regions, the latter three being, respectively, 2 kb, 2-4 kb, and more than 4

kb from the CpG island. Most CG islands of the si-NC group and si-Dnmt3aos group both were detected in the Open Sea regions (Fig 5a). Next, we scrutinized the distribution of DMRs in the context of gene structure. Seven relevant regions were defined: promoter, five-prime untranslated region (UTR), coding sequence (CDS), three-prime UTR, intron, the transcriptional termination region (TTR), and the intergenic region. However, the DMRs were distributed differentially in the seven regions, and had no significant changes between the si-NC group and si-Dnmt3aos group. As shown in Fig 5b, DMRs were concentrated mainly in introns and in the intergenic region. Heat maps of DMRs methylation levels for the two biological replicates of the si-NC group and si-Dnmt3aos group are shown in Fig 5c. In total, 5,143 DMRs were selected based on the criterion of fold change (FC) > 1.5 and corrected *P* value (FDR) < 0.05 (S2 Data). The chromosomal locations of the DMRs are shown in Fig 5d. The red represents high methylation and the blue represents low methylation. The height represents logFC. Circos plots of global genomic methylation level across each chromosome with comparisons between the si-NC group and si-Dnmt3aos group are shown in Fig 5e. On the whole, the chromosomal locations between the si-NC and si-Dnmt3aos-transfected M(IL-4) macrophages were almost identical.

To generate insights into the potential biological functions of DMRs, functional enrichment analysis was performed using GO and KEGG pathway terms. Based on DMR-related genes, we provided a GO functional classification annotation for DMR-related genes. All differently expressed genes were mapped to each term of the

GO database (<http://www.geneontology.org/>) and the KEGG pathway database (<https://www.kegg.jp/kegg/pathway.html>), the gene numbers of the GO and KEGG terms were calculated. A hypergeometric test was used to determine significantly enriched GO and KEGG terms of the DMR-related genes compared to the genome background, and the corrected- $P$  value  $\leq 0.05$  was used as a threshold. GO and KEGG terms fulfilling this condition were defined as significantly enriched GO and KEGG terms of DMR-related genes. Through this analysis, we were able to recognize the top 30 biological functions (Fig 6a and S3 Data) and top 30 pathways in which DMR-related genes participated (Fig 6b and S4 Data).

Our previous investigations of gene expression in macrophage polarization have shown that 1,253 unique genes are significantly differentially expressed genes (DEGs) [22]. Since we have previously confirmed that *Dnmt3aos* plays a critical role in macrophage polarization, knockdown of *Dnmt3aos* expression promotes the M(LPS+IFN- $\gamma$ ) macrophage phenotype and decreases the M(IL-4) macrophage phenotype (Fig 4). In order to explore the relationship between DNA methylation and gene expression in macrophage polarization, we combined the DNA methylation profiles from the si-NC and si-*Dnmt3aos*-transfected M(IL-4) macrophages and gene expression profiles (Data are presented in reference 22) to identify the DMR-related genes. As expected, hypomethylated DMRs were associated with increased gene expression (exhibited as blue dots in Fig 6c), and hypermethylated DMRs were associated with decreased gene expression (exhibited as green dots in Fig 6c). Others in which methylation changes were not associated with expected gene expression

differences are exhibited as pink and purple dots in Fig 6c and are listed in S5 Data. It is known that the high level of DNA methylation in promoter region inhibits the expression of its genes. Therefore, we choose DMR-related genes which are negatively correlated with the level of DNA methylation in promoter region and its expression level of mRNA for follow-up study. Heat maps were used to show the list of DMR-related genes distributed in promoter regions (Fig 6d). Among these genes, *Ifng*, *Icosl*, *Cd24a*, *Ncrna00085*, and *Tnf* genes were hypermethylated in the si-NC group compared to the si-Dnmt3aos group. These genes were associated with increased expression in M(LPS+IFN- $\gamma$ ) macrophages compared to M(IL-4) macrophages. The *Pdia2* and *Entpd3* genes were hypomethylated in the si-NC compared to the si-Dnmt3aos group. These genes were associated with decreased expression in M(LPS+IFN- $\gamma$ ) macrophages compared to M(IL-4) macrophages (see S6 Data).

Given the finding that the differential expression of *Dnmt3a* in polarized macrophages was dependent on *Dnmt3aos* and was responsible for the DNA methylation of DMR-related genes, we sought to determine whether the expression of DMR-related genes was also regulated by the *Dnmt3aos-Dnmt3a* axis. As expected, the results of this experiment showed that compared to the si-NC group, knockdown of *Dnmt3aos* expression not only down-regulated the M(IL-4) macrophage phenotype related genes (*Arg1*, *YM1*, and *FIZZ1*), but also influenced the expression of the selected DMR-related genes like *IFN- $\gamma$* , *Icosl*, *Cd24a*, *TNF- $\alpha$* , *Lrrk2*, *Lox*, *Pdia2* and *Entpd3* (Fig 7a). Additionally, *IFN- $\gamma$* , *Icosl*, *Cd24a*, *TNF- $\alpha$* , *Lrrk2*, and *Lox* were also

elevated in macrophages treated with specific siRNA targeting *Dnmt3a* for knockdown in M(IL-4) (Fig 7b). The same results were observed in M(IL-4) macrophages treated with the DNMT inhibitor 5-Aza-2'-deoxycytidine (5-Aza-CdR) (Fig 7c).

To further validate the differential methylated CG sites in the DMR region from the MeDIP-seq results (S7 Data), genomic DNA samples of the si-NC and si-Dnmt3aos-transfected M(IL-4) macrophages were treated with sodium bisulfate and amplified by PCR with specific primers. After TA cloning, five positive clones were selected for DNA sequencing. The methylation patterns of these genes are displayed in white and black rectangles (Fig 7e), where the black and white rectangles represent methylated CG and non-methylated CG loci, respectively. The bisulfite sequencing PCR (BSP) sequencing results were analyzed and are summarized in Fig 7e and S5-8 Fig. The whole *IFN-γ* DMR region from the MeDIP-seq results contained 8 CG sites (Fig 7d), but the BSP sequencing successfully sequenced sites 1-2 and 6-8 in order. The white-black rectangle diagram shows that only the site 2 and site 7 CG sites were hypermethylated in the si-NC group compared to the si-Dnmt3aos group and were in accordance with the MeDIP-seq results (Fig 7e). Bisulfite pyrosequencing was then performed to further validate the global DNA methylation percentages of the single CG dinucleotide locus at the site 2 and site 7 CG sites in the *IFN-γ* DMR region, which were differentially methylated according to the BSP results in the si-NC and si-Dnmt3aos-transfected M(IL-4) macrophages. The results showed that the site 2 CG dinucleotide loci of *IFN-γ* CG sites had significant differences between the two group

macrophages, while the site 7 CG dinucleotide loci of *IFN-γ* CG sites were calculated as having no difference (Fig 7f). The expression of *IFN-γ* was induced when its promoter was demethylated, and this induction was achieved by Dnmt3a and *Dnmt3aos* knockdown (Fig 7g). These results collectively suggested that *Dnmt3aos-Dnmt3a* axis mediated DNA methylation modification was involved in macrophage polarization.

## Discussion

Macrophage polarization is associated with a variety of diseases, such as infection, tumors, and obesity. Based on the polarization of macrophages into M1 and M2, two extreme categories under different environmental stimuli, the functions of macrophages are completely different and are even mutually inhibited. Appropriate activation of macrophages helps to clear pathogens and tumors, while inappropriate activation of macrophages may inhibit an organism's immune system, promoting tumor occurrence or progression and chronic infection [37-40]. Macrophage polarization is regulated by different mechanisms, including intracellular signaling pathways, transcription factors, and epigenetic and post-translational modifications. Recent studies have shown that non-coding RNA (ncRNA) also participates in the regulation of macrophage polarization [23,41-43]. At the present time, lncRNA is a hotspot in various research fields, and several reports have confirmed that lncRNA plays vital roles in macrophage differentiation and activation [10-14]. Our study was designed to identify novel and functional lncRNA molecules in two major patterns of



macrophage activation.

In the present study, we analyzed lncRNA expression profiles in polarized BMDMs to uncover the potential role of lncRNAs in macrophage polarization via high-throughput microarray techniques. Among the thousands of identified differentially expressed lncRNAs, we found 627 that were up-regulated and 624 that were down-regulated in M(LPS+IFN- $\gamma$ ) macrophages compared to M(IL-4) macrophages. Following this, four lncRNAs (*AK048798*, *AW112010*, *4933417E11Rik*, and *Dnmt3aos*) were selected for further confirmation by RT-qPCR. *AK048798* was selected because its potential target gene is *Hif1 $\alpha$*  via trans-target prediction (data were not shown). This gene encodes a protein that has been shown to modulate macrophage polarization and to function in many diseases. *Dnmt3aos* was selected because it is a known lncRNA with no reported functionality. It locates on the antisense strand of *Dnmt3a*, which is an important component involved in epigenetic regulation [44,45]. The other two lncRNAs were randomly selected. The data showed that the RT-qPCR results were consistent with the microarray data.

Mechanistically, lncRNAs regulate gene expression via distinct processes that promote or inhibit recruitment of epigenetic regulators to modulate chromatin structure. Recent reports have shown that antisense lncRNA may function in sense-antisense pairs [28-31]. Our results showed the same regulation pattern. We saw that knockdown of *Dnmt3aos* expression altered the expression of *Dnmt3a* at both the mRNA and the protein levels in primary BMDMs, but silencing *Dnmt3a* did not alter the expression of *Dnmt3aos* (Fig 3). We also found that both the expression

levels of *Dnmt3aos* and *Dnmt3a* were correlated to macrophage polarization. Meanwhile, we observed that *Dnmt3aos* was highly enriched in the nucleus, and *Dnmt3a*, as one of the DNA methyltransferases, catalyzed *de novo* DNA methylation in the nucleus. *Dnmt3a* plays an important role in cell development and tumorigenesis. DNA methylation represents one of the major epigenetic modifications and plays key roles in a variety of regulatory mechanisms of life processes [46-47]. The DNA methyltransferase (DNMT) family contains DNMT1, DNMT3A, and DNMT3B. DNA methylation in macrophage polarization is rarely reported [15] and lncRNA-mediated epigenetic modifications have not been previously examined. In our study, we determined that the DNA methylation levels in the two distinct kinds of polarized macrophages were significantly different. Notably, the pattern of DNA methylation also was found to be different in the two macrophage extremes. MeDIP-seq results showed that there were significant differences in genome-wide methylation levels between the si-NC and si-*Dnmt3aos*-transfected M(IL-4) macrophages. Combined analysis of DMR-related genes and mRNA expression profiles (reported in the literature 22) revealed a significant correlation between differential DMR-related genes and differential mRNA (Fig 5 and Fig 6). Our new results demonstrate that the *Dnmt3aos*-*Dnmt3a* interaction could be a key mechanism in macrophage polarization.

In fact, an altered genomic DNA methylation pattern characterized by regionally modified patterns of hypo- and hypermethylation exists in the si-NC and si-*Dnmt3aos*-transfected M(IL-4) macrophages. Notably, there was no major change

in the methylation pattern at CpG islands, and the abnormal hypo- and hypermethylation status existed mostly in regions where CpG sites were sparse. Theoretically, reducing DNA methylation at gene promoters is associated with gene activation [48]. Our data also showed that inhibition of *Dnmt3aos* or *Dnmt3a* expression significantly increased the expression of the DMR enriched macrophage polarization related genes *IFN- $\gamma$* , *Cd24a*, *Icosl*, *Lox*, *TNF- $\alpha$* , and *Lrrk2*. Then we confirmed the DNA methylation level by using BSP sequencing and bisulfite pyrosequencing. The results showed that among the randomly selected five TA clones used in the BSP DNA sequencing of *Lox* gene, the DNA methylation levels were hypomethylated in the si-NC group compared to the si-Dnmt3aos group (S5a and S5b Fig), and for *Icosl* gene, there was no difference between two groups (S5c and S5d Fig). The other four genes (*IFN- $\gamma$* , *Cd24a*, *TNF- $\alpha$* , and *Lrrk2*) all contain the CG sites that were hypermethylated in the si-NC group compared to the si-Dnmt3aos group. We believe that BSP and pyrosequencing can also detect DNA hypomethylation and mixed methylation, and pyrosequencing can reliably detect DNA methylation differences among different cell populations, because bisulfite-treated DNA need not be cloned into bacterial expression vectors to avoid false positive results caused by random selection of clones. The corresponding selected hypermethylated CG sites in the si-NC group from the above four genes were validated through pyrosequencing. In summary, from the BSP and pyro-sequencing results, we find that only the CG dinucleotide locus at site 2 of the *IFN- $\gamma$*  CG sites in the DMR region was confirmed to be significantly differentially methylated. The fact that the sequencing results were

not consistent with the MeDIP-Seq results may possibly be because the MeDIP-seq enriched DNA sequences were sequence tandem repeats, which can be immunoprecipitated by 5-mC antibody, causing false positive results. The middle three CpG sites of the *IFN- $\gamma$*  enriched DNA sequences could not be successfully sequenced for the same reason. On the other hand, as BSP sequencing required the cloning of bisulfite-treated DNA into bacterial expression vectors, and then randomly select positive clones for subsequent PCR and sequencing. However, the number of five clones selected by BSP sequencing in this study is relatively small and there is a great chance, so we think that BSP results may not represent the actual level of methylation. Bisulfite pyrosequencing, because of its own limitations on the length of sequencing fragments, is based on the results of BSP sequencing to select each gene difference CG site for pyrosequencing verification. The other three genes, *Cd24a*, *TNF- $\alpha$* , and *Lrrk2* pyrosequencing showed no significant methylation differences at CG loci (S6-8 Fig), which may be due to the above reasons. Therefore, our data suggest that lncRNA *Dnmt3aos* regulates *Dnmt3a* expression leading to aberrant DNA methylation in macrophage polarization and *Dnmt3aos* specifically regulates the DNA methylation patterns of genes. In addition, mechanisms by which *IFN- $\gamma$*  activates genes to promote macrophage activation via the Jak-STAT1 signaling pathway are well studied. A recent study has indicated that *IFN- $\gamma$*  suppresses the basal expression of genes corresponding to an M2-like phenotype in *IFN- $\gamma$* -primed human macrophages [49]. In view of this, our study did not further explore the *IFN- $\gamma$*  function in macrophage polarization.

In summary, this present study has determined the expression profiles of lncRNAs in macrophage polarization and contributes to the growing understanding of the role of lncRNAs in macrophage exposure to different stimuli. We found that *Dnmt3aos* plays a vital role in macrophage polarization. We also examined the global DNA methylation profiles between the si-NC and si-*Dnmt3aos*-transfected M(IL-4) macrophages, and demonstrated that *Dnmt3aos-Dnmt3a* axis-mediated aberrant DNA methylation may play a key role in regulating macrophage polarization. Our study enriches our understanding of the mechanism of macrophage polarization.

## Materials and Methods

### Ethics statement

All animal experimental procedures were approved by the Animal Ethics Committee of Wannan Medical College (Wuhu, China) and were performed according to the guidelines for the Care and Use of Laboratory Animals (Ministry of Health, China, 1998). The animals were sacrificed by cervical dislocation following anesthetized with a mixture of isoflurane and oxygen (3% v/v). All efforts were made to minimize the suffering of the animals.

### Animals

BALB/c mice 6-10 weeks of age and 25-30 g in weight were purchased from the Experimental Animal Center of Qinglongshan (Nanjing, China), were housed in pathogen-free mouse colonies, and fed a chow diet. Mice were kept in 12 – 12 hours

of light-dark cycle; food and water were available ad libitum.

### **Primary BMDM Isolation and Culture**

Primary bone marrow-derived macrophages (BMDMs) of mice were obtained as described previously [22,23]. Briefly, BMDMs isolated from the femurs and tibias of mice were cultured with DMEM supplemented with 20% fetal bovine serum (FBS, Gibco), together with 20% L929 cell supernatant on 10 cm cell culture dishes at 37°C and 5% CO<sub>2</sub>. After 7 days of culture, the medium was removed, and the cells were cultured in fresh RPMI-1640 supplemented with 10% FBS for an additional 24 h. To induce the polarization of macrophages, BMDMs were then treated with DMEM/10% FBS containing 100 ng/ml LPS (Sigma) and 20 ng/ml IFN- $\gamma$  (PeproTech) to produce M(LPS+IFN- $\gamma$ ) polarization, or with 20 ng/ml IL-4 (PeproTech) to produce M(IL-4) macrophages. After 48 h stimulation, the resulting cells were harvested for identification by morphology observation and flow cytometry (FCM) assay as in our previous publication [22-24].

### **Microarray and Bioinformatic Analyses**

An SBC mouse (4\*180K) LncRNA microarray was designed for the global profiling of mouse LncRNAs and protein-coding transcripts. The sample preparation and microarray hybridization were performed as we have described previously [22]. Briefly, the total RNA from each sample was amplified and labeled by using a Low Input Quick Amp WT Labeling kit (Agilent Technologies). Labeled cRNA was

purified using an RNeasy Mini kit (Qiagen GmbH). The concentration and specific activity of the labeled cRNAs (pmol Cy3/ $\mu$ g cRNA) were measured using a NanoDrop 2000. Each SBC mouse (4\*180K) LncRNA microarray slide (Agilent Technologies Inc.) was hybridized with 1.65  $\mu$ g Cy3-labeled cRNA using a gene expression hybridization kit (Agilent Technologies, Inc.). After 17 h of hybridization, the slides were scanned using an Agilent Microarray Scanner G2565C (Agilent Technologies, Inc.). Approximately 33,231 lncRNAs and 39,430 coding transcripts collected from the most authoritative databases, such as NCBI RefSeq, UCSC, ENSEMBL, FANTOM, UCR, and LNCRNA-DB were detected using microarrays. The Agilent Feature Extraction software (version 10.7; Agilent Technologies, Inc.) was used to analyze the acquired array images. Quantile normalization and subsequent data processing were performed using GeneSpring software version 11.0 (Agilent Technologies, Inc.). Microarray analysis was performed by Shanghai Biotechnology Corporation (Shanghai, China). Array data of differentially expressed protein-coding genes (fold change > 2 and  $P < 0.5$ ) were deposited at the Gene Expression Omnibus database of the National Center for Biotechnology Information (accession no. GSE81922).

### **Isolation of RNA and RT-qPCR**

Total RNAs were extracted using the TRIzol reagent (Invitrogen). Cytosolic and nuclear fractions were prepared using the PARIS<sup>TM</sup> Kit (ThermoFisher Scientific) according to the instructions, and cDNA was synthesized using a SuperScript III

First-Strand synthesis system (Life Technologies) with oligo(dT) and random primers according to the manufacturer's instructions. Quantitative RT-qPCR was performed using QuantiTect SYBR®-Green PCR kits (Qiagen) and glyceraldehyde 3-phosphate dehydrogenase (*GAPDH*) or U6 as an internal control utilizing an Applied Biosystems Q3 real-time PCR system. The reactions were incubated in 96-well plates at 95°C for 3 min, followed by 40 cycles of 95°C for 15 sec and 60°C for 30 sec, followed by a dissociation curve. All the PCR reactions were run in triplicate. A complete list of primers used in this study is listed in Supplementary Table S1.

## RNA FISH

RNA FISH was performed as described by the manufacturer's instructions as well as a previous publication [50]. In this study, a FAM-labeled locked nucleic acid (LNA) probe (Exiqon) against Dnmt3aos was used for RNA FISH. DAPI was used for nucleic counterstaining. Briefly, cultured cells were rinsed once with PBS and fixed with 4% paraformaldehyde (Sigma) in PBS for 20 min, then rinsed three times with PBS, permeabilized with 0.2% Triton X-100 (Sigma) in PBS for 15 min, washed twice with PBS, and incubated 30 min at 37°C with pre-hybridization buffer. Following this, cells were incubated 17 h at 37°C with hybridization buffer containing 500 nM FAM-labeled LNA probe. After successively washing with 4× SSC containing 0.5% Tween-20 three times, and 2× SSC, 1× SSC, and PBS once each, cells were stained with DAPI to visualize cell nuclei, rinsed three times with PBS, dried, and mounted in Vectashield mounting medium for fluorescent imaging. All



immunofluorescence staining was photographed under either a confocal or an immunofluorescence microscope.

### **Small Interfering RNA and Transfection of BMDMs**

LncRNA smart silencer (a siRNA mix containing three ASOs and three siRNAs) targeting Dnmt3a at different sites and small interfering RNAs (siRNAs) against Dnmt3a and negative control (NC) with no definite target were synthesized by RiboBio (Guangzhou, China). BMDMs were seeded on six-well plates at a density of  $5 \times 10^5$  cells/well overnight and then transfected with siRNA or the negative control at a final concentration of 100 nM using Lipofectamine 3000 (Invitrogen, USA). The interfering efficiency was detected by RT-qPCR or western blot 48 hours after transfection, and the siRNAs with silencing efficacy of more than 70% were selected for further experiments. Sequences of siRNAs are provided in Supplementary Table S2.

### **Western blotting**

BMDMs were transfected with either siRNA or the negative control as described above. At 48 h after transfection, cells were lysed in RIPA lysis buffer supplemented with cocktail protease inhibitor (Roche). Proteins were separated by SDS-PAGE and transferred onto a nitrocellulose filter membrane (Millipore, USA). The membranes were incubated with primary antibodies, either anti-Dnmt3a (1:1000, Abcam, USA), or anti-actin (1:1000, Santa Cruz, USA) in 5% milk/TBST buffer (25 mM Tris pH 7.4,

150 mM NaCl, 2.5 mM KCl, 0.1% Tween-20) overnight, followed by incubation with horseradish peroxidase (HRP)-conjugated anti-mouse or anti-rabbit IgG (Abcam) for 1 h. The target proteins were detected on the membranes by enhanced chemiluminescence (Millipore).

#### **Griess assay**

Primary BMDMs were transfected with si-NC or si-Dnmt3aos for 48 h, followed by stimulation with LPS (100 ng/mL) plus IFN- $\gamma$  (20 ng/ml) for an additional 6 h. The supernatants from the two groups of cells were collected, and then 50  $\mu$ l aliquots of the conditioned medium were mixed with 50  $\mu$ l of Griess reagent (Beyotime Biotechnology, China) and incubated for 10 min at room temperature in the dark. The colorimetric reaction was then measured at 540 nm using a Multiskan Go microplate reader (Thermo Scientific, Rockford, IL, USA).

#### **Arginase activity assay**

Primary BMDMs were transfected with si-NC or si-Dnmt3aos for 48 h, followed by stimulation with IL-4 (20 ng/ml) for an additional 24 h. Briefly,  $1 \times 10^6$  treated macrophages were lysed with 50  $\mu$ l of 0.1% Triton X-100 for 30 min and then added to 50  $\mu$ l of 50 mM Tris-HCl/10 mM  $\text{Cl}_2\text{Mn} \cdot 4\text{H}_2\text{O}$  (pH 7.5) and incubated at 55°C for 10 min. L-arginine hydrolysis was carried out by incubating with 25  $\mu$ l of 0.5 M L-arginine (pH 9.7) at 37°C for 60 min. The reaction was then stopped with 400  $\mu$ l of stop solution ( $\text{H}_2\text{SO}_4$  (96%)/ $\text{H}_3\text{PO}_4$  (85%)/ $\text{H}_2\text{O}$  (1:3:7, v/v/v)) and 25  $\mu$ l of 9% of

2-isonitrosopropiophenone. The reactions were incubated at 100°C for 45 min and 100 µl of each sample was analyzed using a microplate reader at 540 nm. A standard curve was generated from urea solutions (0-20 mM), which were used to determine the final concentrations.

### **Methylation Analysis by MeDIP Sequencing**

DNA and RNA from the si-NC and si-Dnmt3aos-transfected M(IL-4) macrophages were extracted, and high throughput sequencing and MeDIP-seq were conducted by Shanghai Biotechnology Corporation, China. Detailed procedures were according to Chavez's publication [51]. Briefly, DNA (3 µg) was sonicated at intensity 4 for 200 cycles per burst for 55 s (Covaris S2), and DNA fragments were end-repaired, ATP-tailed, and adapter-ligated with the Sample Preparation Kit (Illumina). Then DNA was recovered by AMPure XP Beads and used for methylated DNA immunoprecipitation (MeDIP) using the Magnetic Methylated DNA Immunoprecipitation Kit (Diagenode) according to the manufacturer's protocol. After MeDIP, remaining DNA was PCR-amplified with sequencing primers and used for sequencing (Illumina Hiseq2500). Raw reads were preprocessed using the FASTX-Toolkit. MeDIP-seq peaks were counted using MACS. The depth of genomic regions was calculated and plotted using Integrative Genomics Viewer (IGV) and IGV Tools software.

### **Bisulfite modification, bisulfite sequencing, and pyrosequencing**

595 Genomic DNA was isolated from the si-NC and si-Dnmt3aos-transfected M(IL-4)  
 596 macrophage cells and was then treated with bisulfite using the Imprint DNA  
 597 Modification Kit (Sigma-Aldrich). Bisulfite sequencing and pyrosequencing were  
 598 conducted by Shanghai Sangon Biotech Corporation, China. The procedure details  
 599 were reported in previous publications [51,52]. Briefly, the bisulfite conversion-based  
 600 PCR primers were designed with the MethPrimer program. Primers are listed in  
 601 Supplementary Table S3. PCR was performed using *Pfu* DNA polymerase (Sangon  
 602 Biotech Corporation) under the following conditions: initial incubation at 98°C for 4  
 603 min, then 20 cycles of 94°C for 45 s, 66°C for 45 s, and 72°C for 1 min of touchdown  
 604 PCR with a decrease of 0.5°C every cycle, continuing with 20 cycles of 94°C for 45 s,  
 605 56°C for 45 s, and 72°C for 1 min, followed by 72°C for 8 min for the gene promoter.  
 606 The PCR products were purified using the Wizard DNA Clean-up System (Promega),  
 607 and then cloned into the pGEM-T Easy Vector I (Promega). Five independent clones  
 608 for each sample were picked, and the T7 and Sp6 primers were used to sequence  
 609 inserted fragments. As for pyrosequencing, biotinylated DNA fragments (about 5  
 610 pmoles each) were attached to streptavidin-modified paramagnetic beads  
 611 (Dynabeads™ M-280, Dynal A/S, Skøyen, Norway) by slow revolution of the  
 612 suspensions in a thermostated (43° C) chamber (HB-1, Techne Ltd, Duxford, England)  
 613 in a high salt (BW) buffer (0.05% Tween 20, 0.5 mm EDTA, 1 m NaCl, 5 mm  
 614 Tris-HCl, pH 7.6). Following washing steps in BW buffer and 10 mm Tris-HAc, pH  
 615 7.6, the material was resuspended in 0.15 M NaOH. After a 10-min incubation period,  
 616 the separated DNA strands were saved for subsequent processing as follows: beads

were washed twice in 10 mm Tris-HAc, pH 7.6 and transferred to a solution (20 mm Mg(CH<sub>3</sub>COO)<sub>2</sub>, 10 mm Tris-HAc pH 7.6), containing 20-25 pmoles of the appropriate sequencing primer (primers are listed in Supplementary Table S4). Subsequently, the annealing procedure was conducted. This step comprised heating for 45 s at 95° C followed by cooling at room temperature. Throughout most of the preparation steps, the bead-coupled fragments were processed in parallel using a manifold device equipped with 96 magnetic ejectable microcylinders (PSQ 96 Sample Prep Tool, Pyrosequencing AB), which were protected by a disposable plastic pocketed cover. DNA sequence reading was conducted in a P3 PSQ 96 instrument (Pyrosequencing AB).

## Statistical Analyses

Descriptive statistics were generated for all quantitative data with presentation of means and S.D. Statistical analysis was carried out using Prism (GraphPad) software. Student's *t* test was used to determine statistical significance, defined as  $P < 0.05$ .

## Acknowledgments

This project was supported by the National Natural Science Foundation of China (grant nos. 81472017, 81701557, 81802503, 81870017, and 81772180), Key Projects of Natural Science Research of Universities in Anhui Province (grant no. KJ2016A721 and KJ2018A0265). We thank LetPub ([www.letpub.com](http://www.letpub.com)) for its linguistic assistance during the preparation of this manuscript.

639

## 640 **Author Contributions**

641 K. L. and Y. Z. designed the study. X. L. wrote the paper. M. Z. performed BMDM  
642 cells isolation and culture. H. Y. performed western blotting experiments. X. L.  
643 performed the other all experiments. X. K., W. P., Y. X., X. Z. and T. C. analyzed the  
644 data. M. Z. and J. Y. contributed reagents/materials and animal housekeeping. All  
645 authors approved the final version of the manuscript.

646

## 647 **Competing interests**

648 The authors declare no competing interests.

649

## 650 **References**

- 651 1. Lawrence T, Natoli G. Transcriptional regulation of macrophage polarization:  
652 enabling diversity with identity. Nat Rev Immunol. 2011; 11(11):750-61.  
653 <https://doi.org/10.1038/nri3088> PMID: 22025054.
- 654 2. Ruffell B, Affara NI, Coussens LM. Differential macrophage programming in the  
655 tumor microenvironment. Trends Immunol. 2012;  
656 33(3):119-26. <https://doi.org/10.1016/j.it.2011.12.001> PMID: 22277903; PubMed  
657 Central PMCID: PMCPMC3294003.
- 658 3. Murray PJ, Wynn TA. Obstacles and opportunities for understanding macrophage  
659 polarization. J Leukoc Biol. 2011; 89(4):557-63.  
660 <https://doi.org/10.1189/jlb.0710409> PMID: 21248152; PubMed Central PMCID:

- 661 PMCPMC3058818.
- 662 4. Martinez FO, Gordon S, Locati M, Mantovani A. Transcriptional profiling of the  
663 human monocyte-to-macrophage differentiation and polarization: new molecules  
664 and patterns of gene expression. J Immunol. 2006; 177(10):7303-11.  
665 <https://doi.org/10.4049/jimmunol.177.10.7303> PMID: 17082649.
- 666 5. Labonte AC, Tosello-Tramont AC, Hahn YS. The role of macrophage  
667 polarization in infectious and inflammatory diseases. Mol Cells. 2014;  
668 37(4):275–85. <https://doi.org/10.14348/molcells.2014.2374> PMID: 24625576;  
669 PubMed Central PMCID: PMCPMC4012075.
- 670 6. Buscher K, Ehinger E, Gupta P, Pramod AB, Wolf D, Tweet G, et al. Natural  
671 variation of macrophage activation as disease-relevant phenotype predictive of  
672 inflammation and cancer survival. Nat Commun. 2017; 8:ncomms16041.  
673 <https://doi.org/10.1038/ncomms16041> PMID: 28737175; PubMed Central  
674 PMCID: PMCPMC5527282.
- 675 7. Olefsky JM, Glass CK. Macrophages, inflammation, and insulin resistance. Annu  
676 Rev Physiol. 2010; 72:219-46.  
677 <https://doi.org/10.1146/annurev-physiol-021909-135846> PMID: 20148674.
- 678 8. Wang X, Cao Q, Yu L, Shi H, Xue B. Epigenetic regulation of macrophage  
679 polarization and inflammation by DNA methylation in obesity. Jci Insight. 2016;  
680 1(19):e87748. <https://doi.org/10.1172/jci.insight.87748> PMID: 27882346;  
681 PubMed Central PMCID: PMCPMC5111504.
- 682 9. Guttman M, Amit I, Garber M, French C, Lin MF, Feldser D, et al. Chromatin

signature reveals over a thousand highly conserved large non-coding RNAs in mammals. *Nature*. 2009; 458(7235):223-7. <https://doi.org/10.1038/nature07672> PMID: 19182780; PubMed Central PMCID: PMC2754849.

10. Carpenter S, Aiello D, Atianand MK, Ricci EP, Gandhi P, Hall LL, et al. A long noncoding RNA mediates both activation and repression of immune response genes. *Science*. 2013; 341(6147):789-92. <https://doi.org/10.1126/science.1240925> PMID: 23907535; PubMed Central PMCID: PMC4376668.

11. Chen MT, Lin HS, Shen C, Ma YN, Wang F, Zhao HL, et al. PU.1-regulated long noncoding RNA Inc-MC controls human monocyte/macrophage differentiation through interaction with microRNA 199a-5p. *Mol Cell Biol*. 2015; 35(18):3212-24. <https://doi.org/10.1128/MCB.00429-15> PMID: 26149389; PubMed Central PMCID: PMC4539372.

12. Mao AP, Shen J, Zuo Z. Expression and regulation of long noncoding RNAs in TLR4 signaling in mouse macrophages. *BMC Genomics*. 2015; 16:45. <https://doi.org/10.1186/s12864-015-1270-5> PMID: 25652569; PubMed Central PMCID: PMC4320810.

13. Reddy MA, Chen Z, Park JT, Wang M, Lanting L, Zhang Q, et al. Regulation of inflammatory phenotype in macrophages by a diabetes-induced long noncoding RNA. *Diabetes*. 2014; 63(12):4249-61. <https://doi.org/10.2337/db14-0298> PMID: 25008173; PubMed Central PMCID: PMC4238007.

14. Huang Z, Luo Q, Yao F, Qing C, Ye J, Deng Y, et al. Identification of differentially expressed long non-coding RNAs in polarized macrophages. *Sci*



- Rep. 2016; 6:19705. <https://doi.org/10.1038/srep19705> PMID: 26796525;
- PubMed Central PMCID: PMCPMC4726337.
15. Yang X, Wang X, Liu D, Yu L, Xue B, Shi H. Epigenetic regulation of macrophage polarization by DNA methyltransferase 3b. *Mol Endocrinol.* 2014; 28(4):565-74. <https://doi.org/10.1210/me.2013-1293> PMID: 24597547; PubMed Central PMCID: PMCPMC3968399.
16. Suzuki MM, Bird A. DNA methylation landscapes: provocative insights from epigenomics. *Nat Rev Genet.* 2008; 9(6):465-76. <https://doi.org/10.1038/nrg2341> PMID: 18463664.
17. Maunakea AK, Chepelev I, Zhao K. Epigenome mapping in normal and disease states. *Circ Res.* 2010; 107(3):327-39. <https://doi.org/10.1161/CIRCRESAHA.110.222463> PMID: 20689072; PubMed Central PMCID: PMCPMC2917837.
18. Backdahl L, Bushell AS. Inflammatory signalling as mediator of epigenetic modulation in tissue-specific chronic inflammation. *Int J Biochem Cell Biol.* 2009; 41(1):176-84. <https://doi.org/10.1016/j.biocel.2008.08.023> PMID: 18793748.
19. Takeuchi O, Akira S. Epigenetic control of macrophage polarization. *Eur J Immunol.* 2011; 41(9):2490-3. <https://doi.org/10.1002/eji.201141792> PMID: 21952803.
20. Satoh T, Takeuchi O, Vandenbon A, Yasuda K, Tanaka Y, Kumagai Y, et al. The Jmjd3-Irf4 axis regulates M2 macrophage polarization and host responses against helminth infection. *Nat Immunol.* 2010; 11(10):936-44.

- 727 <https://doi.org/10.1038/ni.1920> PMID: 20729857.
- 728 21. Miller SA, Mohn SE, Weinmann AS. Jmjd3 and UTX play a  
729 demethylase-independent role in chromatin remodeling to regulate T-box family  
730 member-dependent gene expression. Mol Cell. 2010; 40(4):594-605.  
731 <https://doi.org/10.1016/j.molcel.2010.10.028> PMID: 21095589; PubMed Central  
732 PMCID: PMCPMC3032266.
- 733 22. Jiang L, Li X, Zhang Y, Zhang M, Tang Z, Lv K. Microarray and bioinformatics  
734 analyses of gene expression profiles in BALB/c murine macrophage polarization.  
735 Mol Med Rep. 2017; 16(5):7382-7390. <https://doi.org/10.3892/mmr.2017.7511>  
736 PMID: 28944843; PubMed Central PMCID: PMCPMC5865869.
- 737 23. Zhang Y, Zhang Y, Li X, Zhang M, Lv K. Microarray analysis of circular RNA  
738 expression patterns in polarized macrophages. Int J Mol Med. 2017;  
739 39(2):373-379. <https://doi.org/10.3892/ijmm.2017.2852> PMID: 28075448;  
740 PubMed Central PMCID: PMCPMC5358696.
- 741 24. Zhang Y, Zhang M, Zhong M, Suo Q, Lv K. Expression profiles of miRNAs in  
742 polarized macrophages. Int J Mol Med. 2013; 31(4):797-802.  
743 <https://doi.org/10.3892/ijmm.2013.1260> PMID: 23443577.
- 744 25. Ørom UA, Derrien T, Beringer M, Gumireddy K, Gardini A, Bussotti G, et al.  
745 Long noncoding RNAs with enhancer-like function in human cells. Cell. 2010;  
746 143(1):46-58. <https://doi.org/10.1016/j.cell.2010.09.001> PMID: 20887892;  
747 PubMed Central PMCID: PMCPMC4108080.
- 748 26. Tsai MC, Manor O, Wan Y, Mosammaparast N, Wang JK, Lan F, et al. Long

- 749 noncoding RNA as modular scaffold of histone modification complexes. *Science*.  
750 2010; 329(5992):689-93. <https://doi.org/10.1126/science.1192002> PMID:  
751 20616235; PubMed Central PMCID: PMC2967777.
- 752 27. Rinn JL, Kertesz M, Wang JK, Squazzo SL, Xu X, Brugmann SA, et al.  
753 Functional demarcation of active and silent chromatin domains in human loci by  
754 noncoding RNAs. *Cell*. 2007; 129(7):1311-23.  
755 <https://doi.org/10.1016/j.cell.2007.05.022> PMID: 17604720; PubMed Central  
756 PMCID: PMC2084369.
- 757 28. Chan J, Atianand M, Jiang Z, Carpenter S, Aiello D, Elling R, et al. Cutting edge:  
758 a natural antisense transcript, AS-IL1 $\alpha$ , controls inducible transcription of the  
759 proinflammatory cytokine IL-1 $\alpha$ . *J Immunol*. 2015; 195(4):1359-63.  
760 <https://doi.org/10.4049/jimmunol.1500264> PMID: 26179904; PubMed Central  
761 PMCID: PMC4530055.
- 762 29. Qin W, Li X, Xie L, Li S, Liu J, Jia L, et al. A long non-coding RNA, APOA4-AS,  
763 regulates APOA4 expression depending on HuR in mice. *Nucleic Acids Res*. 2016;  
764 44(13):6423-33. <https://doi.org/10.1093/nar/gkw341> PMID: 27131369; PubMed  
765 Central PMCID: PMC5291254.
- 766 30. Gong C, Li Z, Ramanujan K, Clay I, Zhang Y, Lemire-Brachat S, et al. A long  
767 non-coding RNA, LncMyoD, regulates skeletal muscle differentiation by blocking  
768 IMP2-mediated mRNA translation. *Dev Cell*. 2015; 34(2):181-91.  
769 <https://doi.org/10.1016/j.devcel.2015.05.009> PMID: 26143994.
- 770 31. Faghihi MA, Modarresi F, Khalil AM, Wood DE, Sahagan BG, Morgan TE, et al.

Expression of a noncoding RNA is elevated in Alzheimer's disease and drives rapid feed-forward regulation of  $\beta$ -secretase. Nat Med. 2008; 14(7):723-30. <https://doi.org/10.1038/nm1784> PMID: 18587408; PubMed Central PMCID: PMC2826895.

32. Wang L, Zhao Y, Bao X, Zhu X, Kwok YK, Sun K, et al. LncRNA Dum interacts with Dnmts to regulate Dppa2 expression during myogenic differentiation and muscle regeneration. Cell Res. 2015; 25(3):335-50. <https://doi.org/10.1038/cr.2015.21> PMID: 25686699; PubMed Central PMCID: PMC4349245.

33. Brenner C, Deplus R, Didelot C, Lorient A, Viré E, De Smet C, et al. Myc represses transcription through recruitment of DNA methyltransferase corepressor. EMBO J. 2014; 24(2):336-46. <https://doi.org/10.1038/sj.emboj.7600509> PMID: 15616584; PubMed Central PMCID: PMC4545804.

34. Xu J, Wang YY, Dai YJ, Zhang W, Zhang WN, Xiong SM, et al. DNMT3A Arg882 mutation drives chronic myelomonocytic leukemia through disturbing gene expression/DNA methylation in hematopoietic cells. Proc Natl Acad Sci U S A. 2014; 111(7):2620-5. <https://doi.org/10.1073/pnas.1400150111> PMID: 24497509; PubMed Central PMCID: PMC3932885.

35. Zhang G, Estève PO, Chin HG, Terragni J, Dai N, Corrêa IR Jr, et al. Small RNA-mediated DNA (cytosine-5) methyltransferase 1 inhibition leads to aberrant DNA methylation. Nucleic Acids Res. 2015; 43(12):6112-24. <https://doi.org/10.1093/nar/gkv518> PMID: 25990724; PubMed Central PMCID:

793 PMCPMC4499142.

794 36. Sandoval J, Heyn H, Moran S, Serra-Musach J, Pujana MA, Bibikova M, et al.

795 Validation of a DNA methylation microarray for 450,000 CpG sites in the human

796 genome. *Epigenetics*. 2016; 6(6):692-702. PMID: 21593595.

797 37. Li K, Xu W, Guo Q, Jiang Z, Wang P, Yue Y, et al. Differential macrophage

798 polarization in male and female BALB/c mice infected With coxsackievirus B3

799 defines susceptibility to viral myocarditis. *Circ Res*. 2009; 105(4):353-64.

800 <https://doi.org/10.1161/CIRCRESAHA.109.195230> PMID: 19608981.

801 38. Chacón-Salinas R, Serafin-López J, Ramos-Payán R, Méndez-Aragón

802 P, Hernández-Pando R, Van Soolingen D, et al. Differential pattern of cytokine

803 expression by macrophages infected in vitro with different *Mycobacterium*

804 tuberculosis genotypes. *Clin Exp Immunol*. 2005; 140(3):443-9.

805 <https://doi.org/10.1111/j.1365-2249.2005.02797.x> PMID: 15932505; PubMed

806 Central PMCID: PMCPMC1809389.

807 39. Verreck FA, de Boer T, Langenberg DM, van der Zanden L, Ottenhoff TH.

808 Phenotypic and functional profiling of human proinflammatory type-1 and

809 anti-inflammatory type-2 macrophages in response to microbial antigens and

810 IFN-gamma- and CD40L-mediated costimulation. *J Leukoc Biol*. 2006;

811 79(2):285-93. <https://doi.org/10.1189/jlb.0105015> PMID: 16330536.

812 40. Samuel VT, Shulman GI. Mechanisms for insulin resistance: common threads and

813 missing links. *Cell*. 2012; 148(5):852-71.

814 <https://doi.org/10.1016/j.cell.2012.02.017> PMID: 22385956; PubMed Central

- 815 PMCID: PMCPMC3294420.
- 816 41. Zhou YX, Zhao W, Mao LW, Wang YL, Xia LQ, Cao M, et al. Long non-coding  
817 RNA NIFK-AS1 inhibits M2 polarization of macrophages in endometrial cancer  
818 through targeting miR-146a. *Int J Biochem Cell Biol.* 2018; 104:25-33.  
819 <https://doi.org/10.1016/j.biocel.2018.08.017> PMID: 30176290.
- 820 42. Zhao JL, Huang F, He F, Gao CC, Liang SQ, Ma PF, et al. Forced activation of  
821 notch in macrophages represses tumor growth by upregulating miR-125a and  
822 disabling tumor-associated macrophages. *Cancer Res.* 2016; 76(6):1403-15.  
823 <https://doi.org/10.1158/0008-5472.CAN-15-2019> PMID: 26759236.
- 824 43. Zhang Y, Zhang M, Li X, Tang Z, Wang X, Zhong M, et al. Silencing  
825 microRNA-155 attenuates cardiac injury and dysfunction in viral myocarditis via  
826 promotion of M2 phenotype polarization of macrophages. *Sci Rep.* 2016; 6:22613.  
827 <https://doi.org/10.1038/srep22613> PMID: 26931072; PubMed Central PMCID:  
828 PMCPMC4773853.
- 829 44. Haney SL, Upchurch GM, Opavska J, Klinkebiel D, Hlady RA, Suresh A, et al.  
830 Promoter hypomethylation and expression is conserved in mouse chronic  
831 lymphocytic leukemia induced by decreased or inactivated Dnmt3a. *Cell Rep.*  
832 2016; 15(6):1190-201. <https://doi.org/10.1016/j.celrep.2016.04.004> PMID:  
833 27134162; PubMed Central PMCID: PMCPMC4864108.
- 834 45. Shikauchi Y, Saiura A, Kubo T, Niwa Y, Yamamoto J, Murase Y, et al. SALL3  
835 interacts with DNMT3A and shows the ability to inhibit CpG island methylation  
836 in hepatocellular carcinoma. *Mol Cell Biol.* 2009; 29(7):1944-58.

837 <https://doi.org/10.1128/MCB.00840-08> PMID: 19139273; PubMed Central  
838 PMCID: PMCPMC2655625.

839 46. Feng S, Jacobsen SE, Reik W. Epigenetic reprogramming in plant and animal  
840 development. Science. 2010; 330(6004):622-7.  
841 <https://doi.org/10.1126/science.1190614> PMID: 21030646; PubMed Central  
842 PMCID: PMCPMC2989926.

843 47. Jones PA, Baylin SB. The epigenomics of cancer. Cell. 2007; 128(4):683-92.  
844 <https://doi.org/10.1016/j.cell.2007.01.029> PMID: 17320506; PubMed Central  
845 PMCID: PMCPMC3894624.

846 48. Luczak MW, Jagodziński PP. The role of DNA methylation in cancer  
847 development. Folia Histochem Cytobiol. 2006; 44(3):143-54. PMID: 16977793.

848 49. Kang K, Park SH, Chen J, Qiao Y, Giannopoulou E, Berg K, et al. Interferon- $\gamma$   
849 represses M2 gene expression in human macrophages by disassembling enhancers  
850 bound by the transcription factor MAF. Immunity. 2017; 47(2):235-250.  
851 <https://doi.org/10.1016/j.immuni.2017.07.017> PMID: 28813657; PubMed Central  
852 PMCID: PMCPMC5568089.

853 50. Wang L, Bu P, Ai Y, Srinivasan T, Chen HJ, Xiang K, et al. A long non-coding  
854 RNA targets microRNA miR-34a to regulate colon cancer stem cell asymmetric  
855 division. Elife. 2016; 5 pii:e14620. <https://doi.org/10.7554/eLife.14620> PMID:  
856 27077950; PubMed Central PMCID: PMCPMC4859802.

857 51. Chavez L, Jozefczuk J, Grimm C, Dietrich J, Timmermann B, Lehrach H, et al.  
858 Computational analysis of genome-wide DNA methylation during the

differentiation of human embryonic stem cells along the endodermal lineage.

Genome Res. 2010; 20(10):1441-50. <https://doi.org/10.1101/gr.110114.110> PMID:

20802089; PubMed Central PMCID: PMCPMC2945193.

52. Alderborn A, Kristofferson A, Hammerling U. Determination of single-nucleotide

polymorphisms by real-time pyrophosphate DNA sequencing. Genome Res. 2000;

10(8):1249-58. <https://doi.org/10.1101/gr.10.8.1249> PMID: 10958643; PubMed

Central PMCID: PMCPMC310924.

## Figure Legends:

**Fig 1. Identification and characterization of *Dnmt3aos*. (a-b)** LncRNA microarray

expression data from BMDMs incubated in distinct polarizing conditions. A total of

1,251 differentially-expressed lncRNAs were identified between the M(LPS+IFN- $\gamma$ )

and M(IL-4) macrophages. **(a)** Scatter plots show the variation in lncRNA expression

between the M(LPS+IFN- $\gamma$ ) and M(IL-4) macrophages. The values of the X and Y

axes in the scatter plot are the averaged normalized values in each group (log2-scaled).

**(b)** Heat maps of lncRNAs expression profiles between the two groups. “Red”

indicates high relative expression and “green” indicates low relative expression. One

ANOVA test was used for statistical analysis. LncRNA with expression fold change >

2 and with FDR-adjusted *P* value < 0.05 was considered statistically significant. **(c)**

Confirmation of the differential expression of lncRNAs by RT-qPCR. Four

differentially expressed lncRNAs were validated by RT-qPCR. The y-axis represents

the log2-transformed median fold-change in expression. **(d)** LncRNA *Dnmt3aos*



locates on the *Dnmt3a* opposite strand on mouse chromosome 12. (e) RT-qPCR detection of *Dnmt3aos* level in cellular fractions from BMDMs. U6 and GAPDH were the nuclear and cytoplasmic controls, respectively. Data were expressed as the means  $\pm$  SD of three independent experiments. (f) *Dnmt3aos* expression in BMDMs detected by RNA-FISH. Scale bar, 20  $\mu$ m.

**Fig 2. Differential expression of *Dnmt3aos* during macrophage polarization.** (a) *Dnmt3aos* was assessed by RT-qPCR and normalized to GAPDH in BMDMs after 48 h of stimulation with LPS (100 ng/ml) plus IFN- $\gamma$  (20 ng/ml) or IL-4 (20 ng/ml). (b) *Dnmt3aos* levels in macrophages following M(LPS+IFN- $\gamma$ )-to-M(IL-4) re-polarization by IL-4 (20 ng/ml) for 24 h. (c) *Dnmt3aos* levels in macrophages following M(IL-4)-to-M(LPS+IFN- $\gamma$ ) re-polarization by LPS (100 ng/ml) plus IFN- $\gamma$  (20 ng/ml) for 8 h. Data are expressed as the means  $\pm$  SD of three independent experiments. \*\* $P$  < 0.01, \*\*\* $P$  < 0.001,  $P$ -value was calculated based on Student's  $t$  test.

**Fig 3. *Dnmt3aos* regulates *Dnmt3a* mRNA and protein expression *in vitro*.** (a-b) Time course of *Dnmt3aos* (a) or *Dnmt3a* (b) expression in BMDMs after stimulation with LPS (100 ng/ml) plus IFN- $\gamma$  (20 ng/ml) or IL-4 (20 ng/ml). (c-d) Knockdown of *Dnmt3aos* (c) or *Dnmt3a* (d) in BMDMs with lncRNA smart silencer (si-*Dnmt3aos*) or siRNA specifically targeting *Dnmt3a* (si-*Dnmt3a*). *Dnmt3aos* and *Dnmt3a* expression were assessed by RT-qPCR. Nontargeting siRNA negative control (si-NC) was used as the control. (e) Knockdown of *Dnmt3aos* in BMDMs with si-*Dnmt3aos* or si-NC. Protein expression of *Dnmt3a* and  $\beta$ -actin set as the endogenous control

were measured by western blotting. Data are expressed as the means  $\pm$  SD of two independent experiments.  $**P < 0.01$ ,  $***P < 0.001$ .  $P$ -value was calculated based on Student's  $t$  test.

**Fig 4. Dnmt3aos plays important roles in BMDMs polarization. (a-b)** Primary BMDMs were transfected with si-NC or si-Dnmt3aos for 48 h, followed by stimulation with LPS (100 ng/mL) plus IFN- $\gamma$  (20 ng/ml) for an additional 6 h. **(a)** Supernatants from the two groups of cells were observed for NO production using Griess activity assays. **(b)** RT-qPCR. RNA was extracted from the two groups of cells and subjected to RT-qPCR analysis with primers specific to iNOS, TNF- $\alpha$ , and IL-12. **(c-d)** Primary BMDMs were transfected with si-NC or si-Dnmt3aos for 48 h, followed by stimulation with IL-4 (20 ng/ml) for an additional 24 h. **(c)** Cells were lysed and investigated for urea production using arginase activity assays. **(d)** RT-qPCR. RNA was extracted from the two groups of cells and subjected to RT-qPCR analysis with primers specific to Arg1, YM1, and FIZZ1. GAPDH was set as the endogenous control. Data are expressed as the means  $\pm$  SD of three independent experiments.  $*P < 0.05$ ,  $**P < 0.01$ ,  $***P < 0.001$ .  $P$ -value was calculated based on Student's  $t$  test.

**Fig 5. MeDIP-seq methylation profiles between the si-NC and si-Dnmt3aos transfected M(IL-4) macrophages. (a)** Distribution and counts of CpG islands (CGI) obtained from the si-NC and si-Dnmt3aos transfected M(IL-4) macrophages are shown in the histogram. **(b)** The average proportions of CGI obtained from the si-NC and si-Dnmt3aos-transfected M(IL-4) macrophages in each region defined by

genomic structure are shown in pie charts. Promoters (-2 kb regions around their TSSs), CpG islands and their Shores (up/down stream 2 kb from the CpG island), Shelf (up/down stream 2-4 kb from the CpG island), and Open Sea (more than 4 kb from the CpG island). **(c)** Heat map of differentially methylated regions (DMRs), selected by highest variances between samples, including mean rpm signals for the two biological replicates of the si-NC and si-Dnmt3aos-transfected M(IL-4) macrophages. Red indicates up-regulated fold change and green indicates down-regulated fold change. **(d)** Chromosomal distribution of DMRs. Red represents high methylation and blue represents low methylation. The height represents logFC (fold change). **(e)** Circos plot of global genomic methylation level across each chromosome between the si-NC and si-Dnmt3aos-transfected M(IL-4) macrophages. The coverage of the genome is observed by a 100 K window, indicating the methylation level of the genome; the outermost circle in the figure is the chromosomes, and each circle inside indicates the genome methylation level of the sample.

**Fig 6. Enrichment analysis of DMRs. (a-b)** Analysis of the top 30 GO enrichment terms **(a)** and the top 30 KEGG pathway enrichment terms **(b)** of DMRs. For each term, the expected and observed gene numbers along with the statistical significance (q-value) for the enrichments are presented. **(c-d)** Correlation analysis of differentially methylated region (DMR) methylation status of the si-NC and si-Dnmt3aos-transfected M(IL-4) macrophages and differentially expressed genes (DEGs) of M(LPS+IFN- $\gamma$ ) and M(IL-4) macrophages. **(e)** Overall view of the

negative correlation between methylation and expression. DEGs are shown on the longitudinal coordinates to show the difference in expression, and the difference in methylation is shown on the transverse coordinates. **(d)** Heat map shows the level and correlation of methylation and expression of each gene. The same genes were placed on the same lines.

**Fig 7. The *Dnmt3aos-Dnmt3a* axis regulates macrophage polarization-related gene expression through modification of DNA methylation. (a-b)** RT-qPCR validation. Knockdown of *Dnmt3aos* **(a)** or *Dnmt3a* **(b)** expression in M(IL-4) macrophages with lncRNA smart silencer (si-*Dnmt3aos*) or siRNA specifically targeting *Dnmt3a* (si-*Dnmt3a*), respectively. M(IL-4) macrophage phenotype related genes and the selected DMR-related genes obtained from negative correlation analysis of DMRs located in promoter regions and DEGs. **(c)** M(IL-4) macrophages were treated with the DNMT inhibitor 5-Aza-CdR for 72 h. The expression of the selected DMRs (obtained from negative correlation analysis of DMRs located in promoter regions and DEGs) were assessed by RT-qPCR. **(d)** The location and exhibition of DNA sequences of DMRs in the promoter region of *IFN-γ* obtained from MeDIP-seq enrichment. The CG sites (sites 1-2 and sites 6-8 in order) with underlining and red color were successfully BSP sequenced. **(e-f)** *IFN-γ* methylation profiles in the si-NC or si-*Dnmt3aos*-transfected M(IL-4) macrophages. **(e)** The open and filled circles symbolize the unmethylated and methylated CGs, respectively. Five colonies of separate CG sites from each group were further analyzed by BSP sequencing. **(f)** Pyrosequencing analysis of the CG methylation level in the selected CG sites of the

*IFN-γ* gene promoter from BSP sequencing results. The figure illustrates the variation in methylation level at CG site 2 and site 7 in the si-NC or si-Dnmt3aos-transfected M(IL-4) macrophages. (g) The expression levels of *IFN-γ* mRNA in M(IL-4) macrophages treated with 5-Aza-CdR, SGI-1027, Dnmt3aos lncRNA smart silencer (si-Dnmt3aos), or Dnmt3a siRNA (si-Dnmt3a). Data were expressed as the means ± SD of three independent experiments. \* $P < 0.05$ .  $P$ -value was calculated based on Student's  $t$  test.

**Fig 1.**

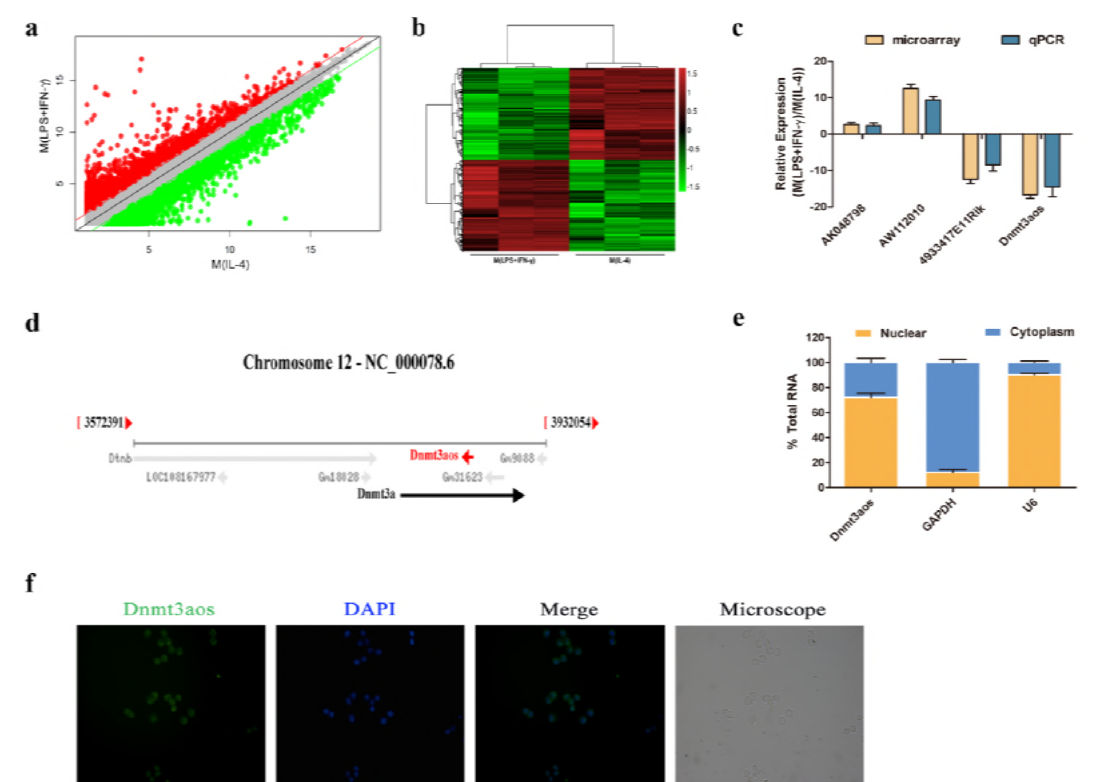

**Fig 2.**

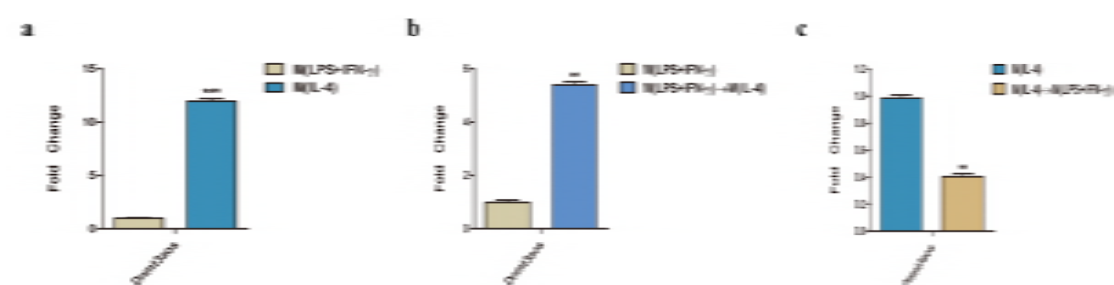

**Fig 3.**

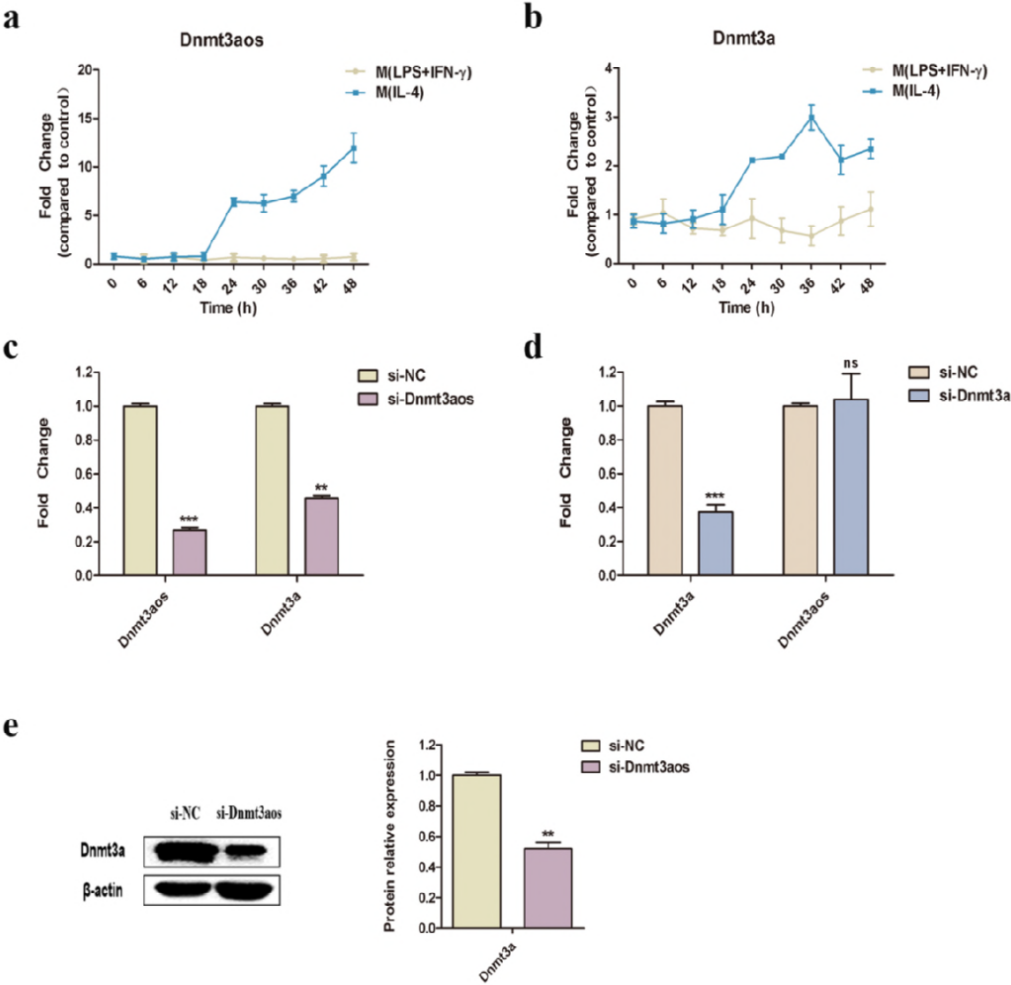

**Fig 4.**

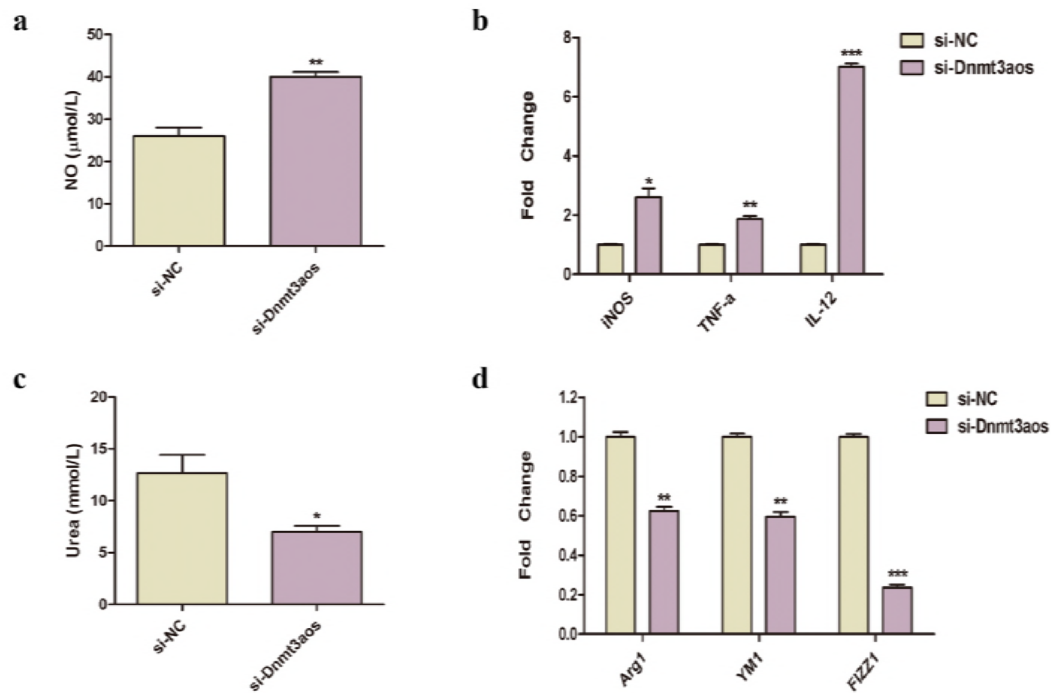



1026 **Fig 5.**

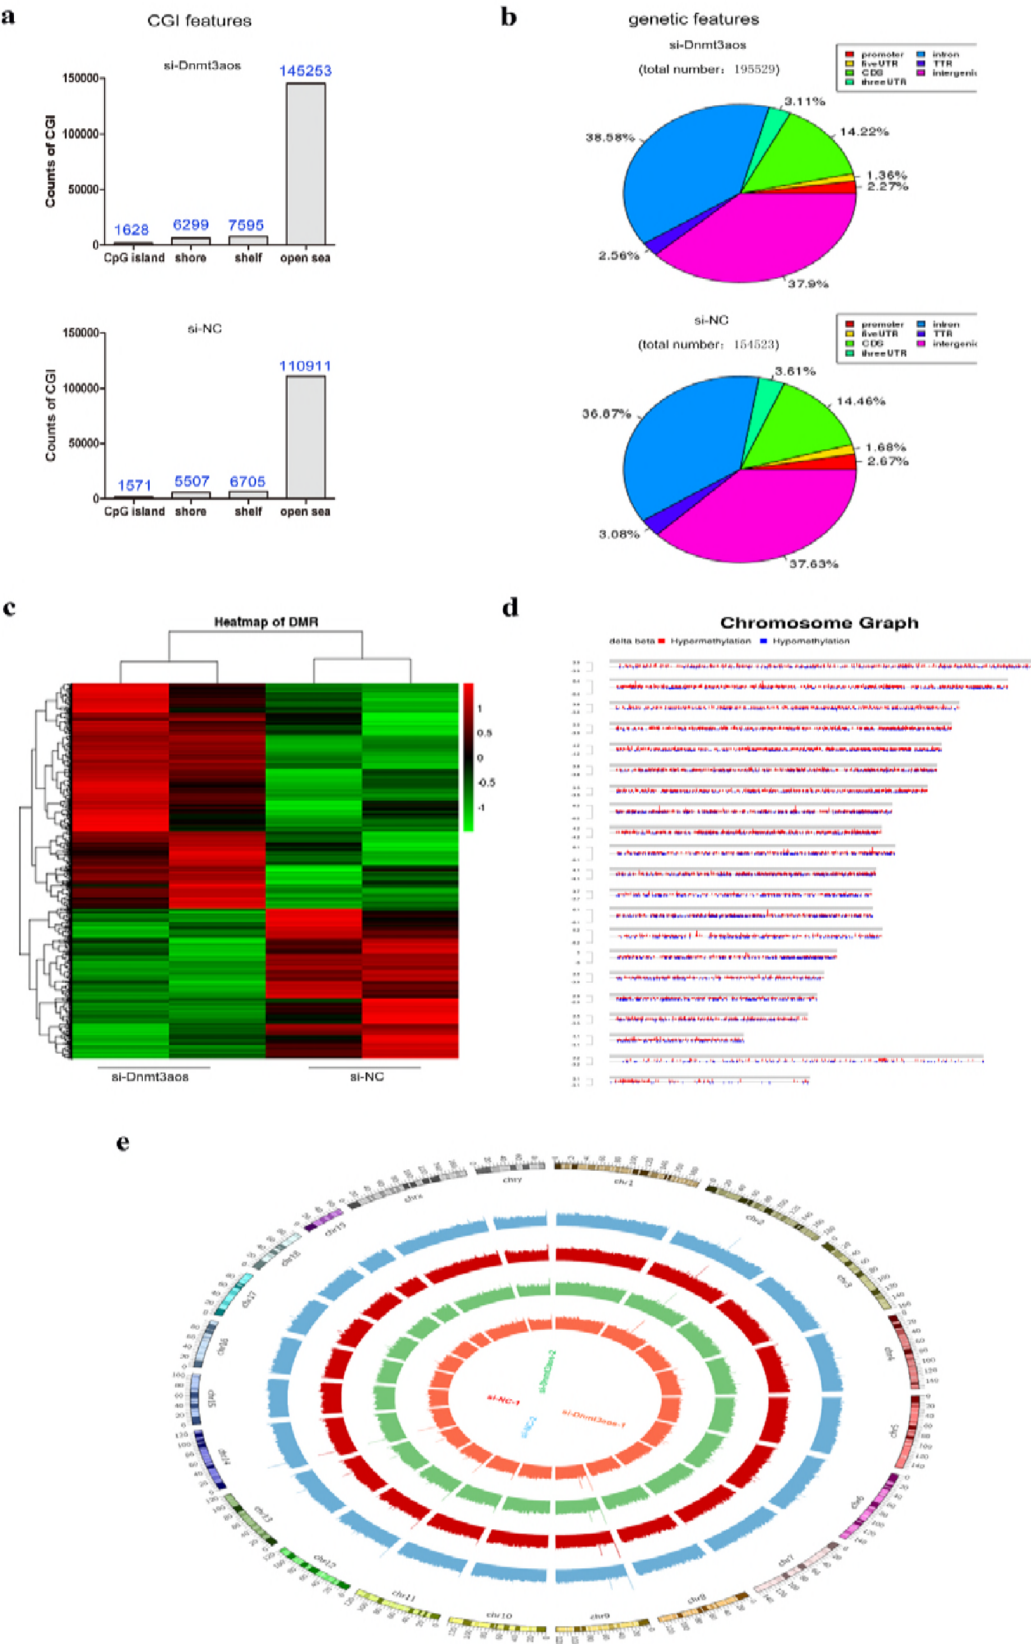

1027

1028

**Fig 6.**

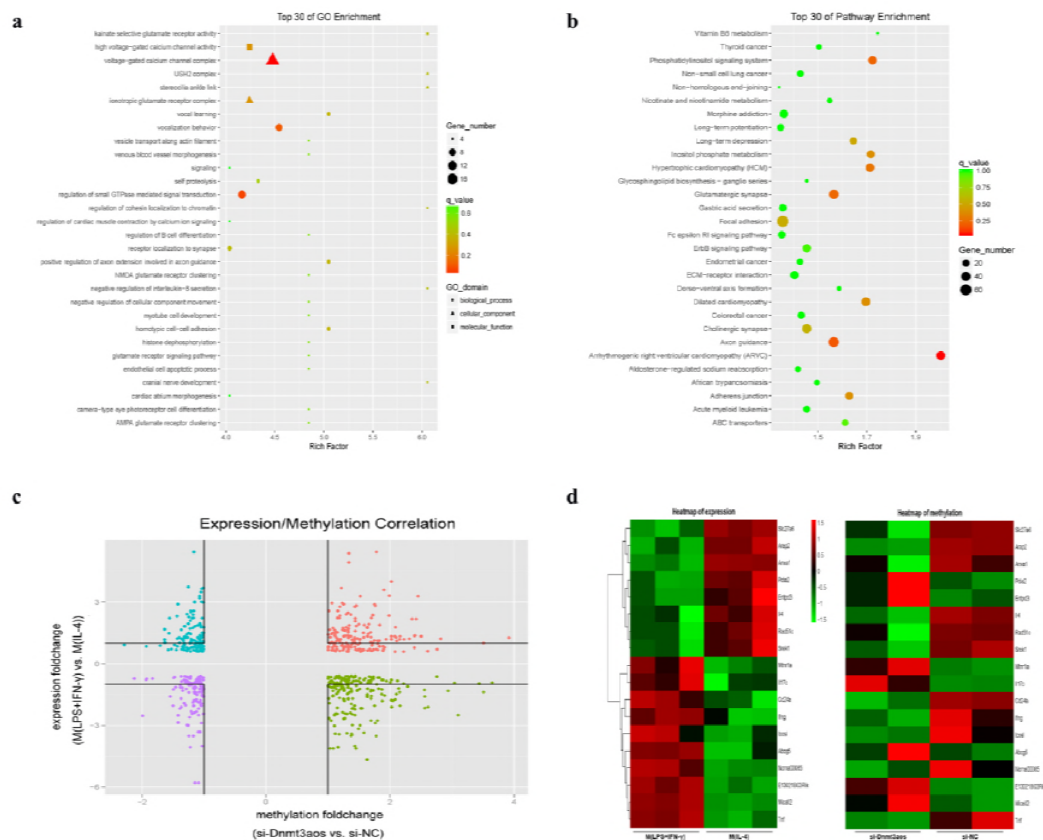

1041 **Fig 7.**

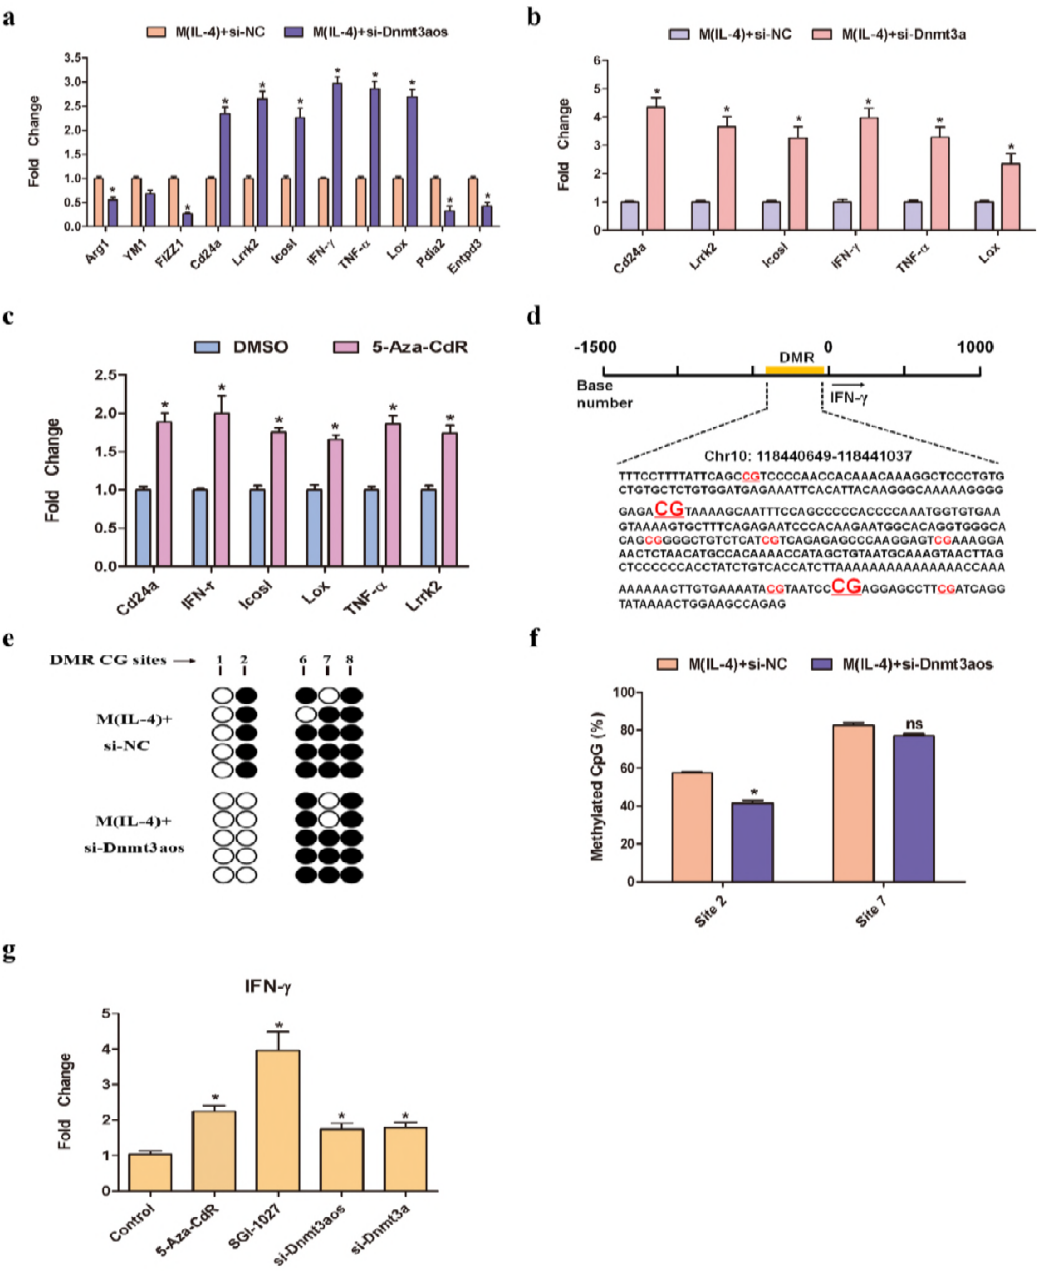

## Supplementary Figure Legends

**S1 Fig** *Dnmt3aos* expression was detected in mouse tissues including lung, brain, spleen, pancreas, liver, heart, kidney, and fat. Error bars depict mean  $\pm$  SD.

**S2 Fig Relative gene expression during macrophage M(LPS+IFN- $\gamma$ )/ M(IL-4) polarization. (a)** Gene expression of iNOS or Arg1 following re-polarization of M(LPS+IFN- $\gamma$ ) macrophages to M(IL-4) macrophages by LPS/IFN- $\gamma$ . **(b)** Gene expression of iNOS or Arg1 following re-polarization of M (IL-4) macrophages to M(LPS+IFN- $\gamma$ ) macrophages by LPS/IFN- $\gamma$ . Data are representative of three separate experiments, and show the means  $\pm$  SD, \*P < 0.05, \*\*P < 0.01, \*\*\*P < 0.001.

**S3 Fig Identification of ex vivo-programmed M(LPS+IFN- $\gamma$ ) and M(IL-4) macrophages.** BMDMs were cultured in the presence of LPS (100 ng/ml) plus IFN- $\gamma$  (20 ng/ml) or IL-4 (20 ng/ml). Polarization specific biomarkers were analyzed by RT-qPCR assays using RNA collected from BMDMs over different time courses post treatment. **(a)** iNOS **(b)** Arg1. Data are representative of three separate experiments and are compared to the control group.

**S4 Fig** *Dnmt3a* siRNA inhibition efficiency in BMDMs was examined by western blotting.

**S5 Fig** *Lox* and *Icosl* methylation profiles in the si-NC or si-*Dnmt3aos* transfected M(IL-4) macrophages. **(a)** The location and exhibition of DNA sequences of DMRs in the region of *Lox* obtained from MeDIP-seq enrichment. The CG sites (sites 1-2 in order) with underlining and red color were successfully BSP sequenced. **(b)** The open and filled circles symbolize the unmethylated and

1071 methylated CGs, respectively. Five colonies of separate CG sites from each group of  
 1072 *Lox* gene were further analyzed by BSP sequencing. (c) The location and exhibition of  
 1073 DNA sequences of DMRs in the region of *Icosl* obtained from MeDIP-seq enrichment.  
 1074 The CG sites (sites 1-24 in order) with underlining and red color were successfully  
 1075 BSP sequenced. (d) The open and filled circles symbolize the unmethylated and  
 1076 methylated CGs, respectively. Five colonies of separate CG sites from each group of  
 1077 *Icosl* gene were further analyzed by BSP sequencing.

1078 **S6 Fig *Cd24a* methylation profiles in the si-NC or si-Dnmt3aos transfected**

1079 **M(IL-4) macrophages. (a)** The location and exhibition of DNA sequences of DMRs  
 1080 in the promoter region of *Cd24a* obtained from MeDIP-seq enrichment. The CG sites  
 1081 (sites 1-12 in order) with underlining and red color were successfully BSP sequenced.  
 1082 (b) The open and filled circles symbolize the unmethylated and methylated CGs,  
 1083 respectively. Five colonies of separate CG sites from each group were further  
 1084 analyzed by BSP sequencing. (c) Pyrosequencing analysis of CG methylation level in  
 1085 the selected CG site of the *Cd24a* gene promoter from the BSP sequencing results.  
 1086 The figure illustrates the variation in methylation level at CG site 12 in si-NC or  
 1087 si-Dnmt3aos-transfected M(IL-4) macrophages.

1088 **S7 Fig *TNF-α* methylation profiles in si-NC or si-Dnmt3aos-transfected M(IL-4)**

1089 **macrophages. (a)** The location and exhibition of DNA sequences of DMRs in the  
 1090 promoter region of *TNF-α* obtained from MeDIP-seq enrichment. The CG sites (sites  
 1091 1-6 in order) with underlining and red color were successfully BSP sequenced. (b)  
 1092 The open and filled circles symbolize the unmethylated and methylated CGs

respectively. Five colonies of separate CG sites from each group were further analyzed by BSP sequencing. **(c)** Pyrosequencing analysis of CG methylation level in the selected CG site of the *TNF- $\alpha$*  gene promoter from the BSP sequencing results. The figure illustrates the variation in methylation levels at CG site 4 in si-NC or si-Dnmt3aos-transfected M(IL-4) macrophages.

**S8 Fig *Lrrk2* methylation profiles in si-NC or si-Dnmt3aos-transfected M(IL-4) macrophages.** **(a)** The location and exhibition of DNA sequences of DMRs of *Lrrk2* obtained from MeDIP-seq enrichment. The CG sites (sites 1-3 in order) with underlining and red color were successfully BSP sequenced. **(b)** The open and filled circles symbolize the unmethylated and methylated CGs, respectively. Five colonies of separate CG sites from each group were further analyzed by BSP sequencing. **(c)** Pyrosequencing analysis of CG methylation levels in the selected CG site of the *Lrrk2* gene from the BSP sequencing results. The figure illustrates the variation in methylation levels at CG site 3 in si-NC or si-Dnmt3aos-transfected M(IL-4) macrophages.

1115 S1 Fig.

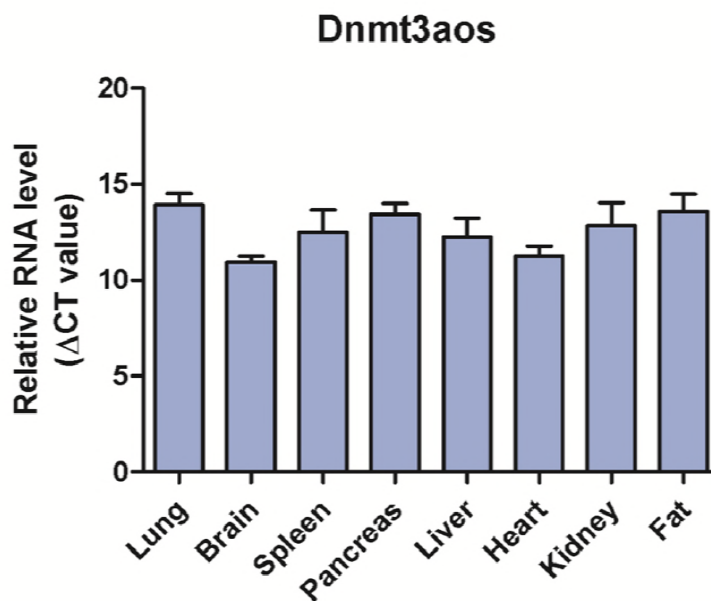

1116

1117

1118 S2 Fig.

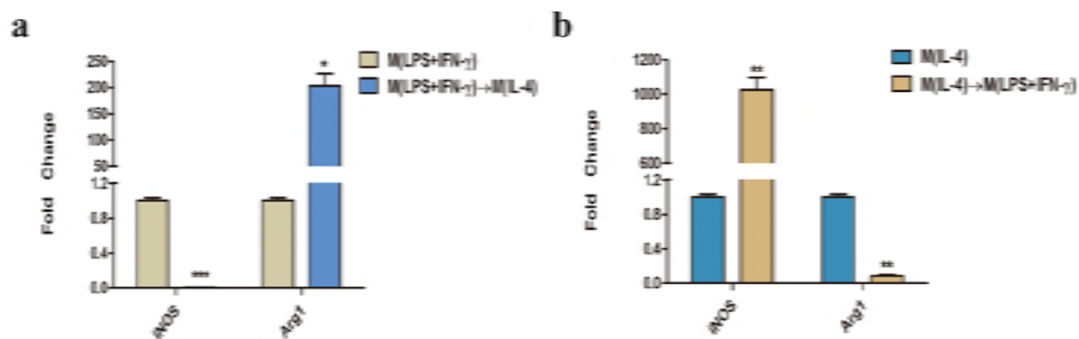

1119

1120

1121 S3 Fig.

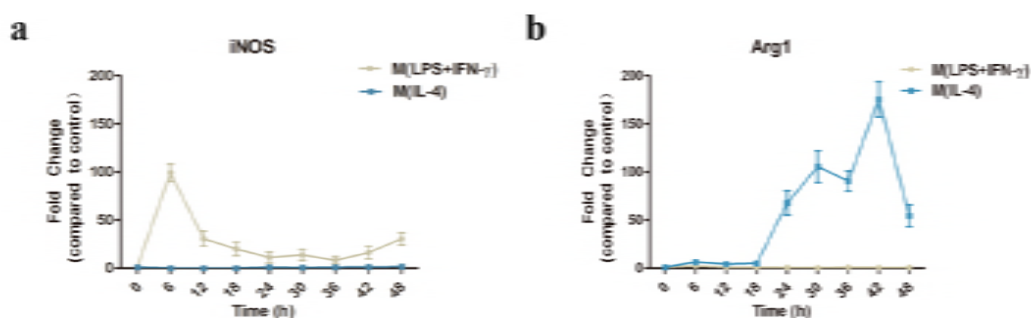

1122







S7 Fig.

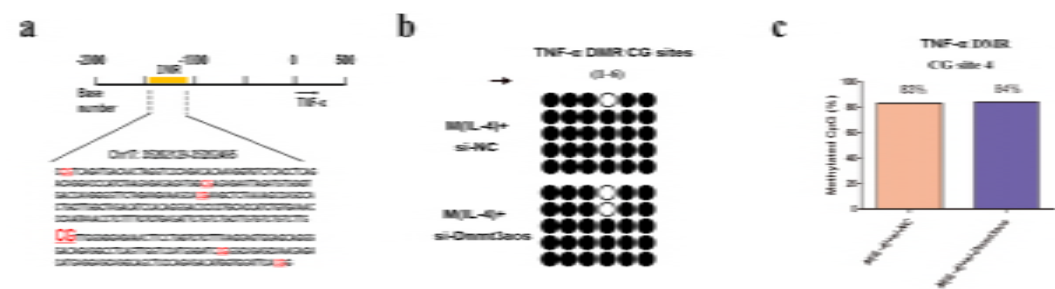

S8 Fig.

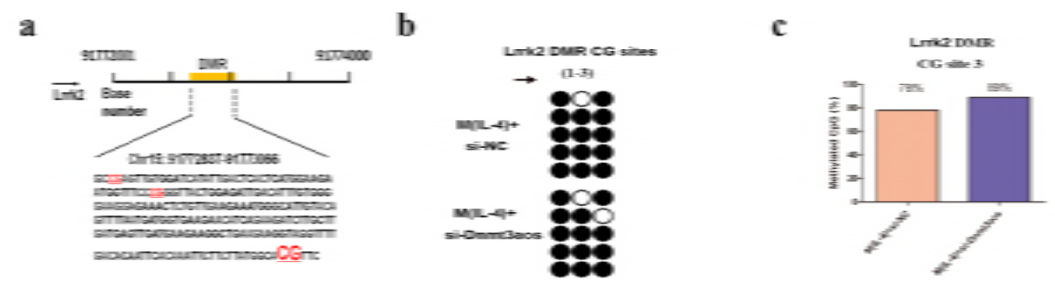

## Supplementary Tables

**Supplementary Table S1. Primer sequences used in real-time PCR are written in 5'- 3' direction.**

| Genes         | Primer (5'- 3')                                         |
|---------------|---------------------------------------------------------|
| AK048798      | GACGGATGAGGAATGGGTTC<br>TCCTGTGAAGTGTGGACTCT            |
| AW112010      | TCTTCTGCCATCAAGCCAAT<br>TCTCTCCTGAACGACCCAGT            |
| 4933417E11Rik | CCAGAAGACACCGAAAGGAA<br>GGATGTGCTGAGTGGAGTGA            |
| Dnmt3aos      | TCTCTAGACACCTCTCCCCT<br>ACATGACACGTGACACCAAA            |
| iNOS          | ATCTTTGCCACCAAGATGGCCTGG<br>TTCCTGTGCTGTGCTACAGTTCCG    |
| TNF- $\alpha$ | CCAGTGTGGGAAGCTGTCTT<br>AAGCAAAAGAGGAGGCAACA            |
| IL-12         | GATGTCACCTGCCCAACTG<br>TGGTTTGATGATGTCCCTGA             |
| Arg1          | TGACTGAAGTAGACAAGCTGGGGAT<br>CGACATCAAAGCTCAGGTGAATCGG  |
| YM1           | ATGAAGCATTGAATGGTCTGAAAG<br>TGAATATCTGACGGTTCTGAGGAG    |
| FIZZ1         | AGGTCAAGGAACCTTCTTGCCAATCC<br>AAGCACACCCAGTAGCAGTCATCCC |
| Dnmt3a        | GAGCAGTCTCAACAGCACCA<br>CTGTGTGGTAGGCACCTGAA            |
| GAPDH         | GGTTGTCTCCTGCGACTTCA<br>TGGTCCAGGGTTTCTTACTCC           |
| U6            | ATTGGAACGATACAGAGAAGATT<br>GGAACGCTTCACGAATTTG          |
| IFN- $\gamma$ | GTTACTGCCACGGCACAGTCATTG<br>ACCATCCTTTTGCCAGTTCCTCCAG   |
| Cd24a         | CATCTGTTGCACCGTTTCC<br>GAGAGAGAGCCAGGAGACCA             |
| Icosl         | CACCTGTCATCAGCACCTCT<br>GGCTATTGTCCGTTGTGTTG            |
| Lrrk2         | CCAGACCAACCAAGGCTCACTATTC<br>ACAGCCACTTCCTCTCCTTCGTAG   |
| Lox           | CAGAGGAGAGTGGCTGAAGG<br>CTGCCGCATAGGTGTCATAA            |

|        |                           |
|--------|---------------------------|
| Pdia2  | CCAGTCAAGACTCTCGTGAGCAAG  |
| Entpd3 | GCATCCAACCTCGGCAATGACAATG |
|        | CCAAGAGCAAGACGCCTGTTCC    |
|        | CTGTGTAGTAGAAGCCTGCGAACG  |

1152

1153 **Supplementary Table S2. Oligonucleotides sequences used in siRNA transfection**  
 1154 **are written.**

| Genes                   | Target sequences                                                                                                                          |
|-------------------------|-------------------------------------------------------------------------------------------------------------------------------------------|
| Dnmt3aos smart silencer | GGACTCACTTCCTGTTGGT<br>CACCAACATGCATCACTTT<br>GCTGTTACATGCTCTAACA<br>TCATGGGTGGTTCCTGCCAG<br>TGACCAACTTGGGAGGCACT<br>TGTGCTGGCAACTAGTGGAT |
| Dnmt3a                  | CATCCACTGTGAATGATAA                                                                                                                       |

1155

1156 **Supplementary Table S3. Primer sequences used in BSP sequencing are written.**

| Genes         | Primer                                                            |
|---------------|-------------------------------------------------------------------|
| IFN- $\gamma$ | CCTCATGGTTTGAGAAGCCCAAGAG<br>GATCAGGTATAAACTGGAAGCCAGAG           |
| Cd24a         | TGGGCACAGAATGGCCAACATCCTG<br>GAGCTTGGTTTCCAGGCATGCACTATC          |
| TNF- $\alpha$ | TAGAAAGAGGGGAAAAATAGAAAG<br>GAGTGAGGCAGCTTAAGTCCGGAG              |
| Lrrk2         | TCTAATGTAGGTTGTATTCTTCTGG<br>GCTATATTTACATGACTTTAATATATAAGAGTCATT |

1157

1158 **Supplementary Table S4. Primer sequences used in Pyrosequencing are written.**

| Genes                    | Primer       |
|--------------------------|--------------|
| IFN- $\gamma$ (CG site2) | AYGTAAAAGTAA |
| IFN- $\gamma$ (CG site7) | TTYGAGGAG    |

---

|                          |            |
|--------------------------|------------|
| Cd24a (CG site12)        | TYGTTTGTG  |
| TNF- $\alpha$ (CG site4) | TAYGTTCG   |
| Lrrk2 (CG site3)         | YGTTGGGGGA |

---

1159
